# Supplementary material for: Genetically Distinct Glossina fuscipes fuscipes Populations in the Lake Kyoga Region of Uganda and Its Relevance for Human African Trypanosomiasis
Source: Biomed Res Int. 2013 Oct 2;2013:614721. doi: 10.1155/2013/614721 (PMC3807537; doi:10.1155/2013/614721)
Supplement: Supplementary file 1 — Appendix 1: Information on the study site, time of collection and number of flies caught in each site. Appendix 2: Details of microsatellite markers used in the study. Appendix 3: Per locus estimates of FIS at 18 microsatellite loci for each sampling locality. Appendix 4: Mitochondrial haplotype information, including frequencies observed across studied populations. New haplotypes recovered from this study are indicated by ∗. Appendix 5: Results of an AMOVA testing for temporal genetic structure in four populations of G. fuscipes sampled in 2008 and also in 2011. Appendix 6: Fst values for temporal samples calculated on microsatellite data. Non-significant values are in bold. Appendix 7: Microsatellite-based FST values pairwise comparison between sampling localities of G. f. fuscipes in Uganda. Appendix 8: Microsatellite-based FST values for pairwise comparisons among the three populations detected using Bayesian clustering. Appendix 9: Details of all first generation migrants detected by Geneclass 2.0, using Lh, Lh/Lmax and STRUCTURE. Appendix 10: Comparison of mtDNA clade and microsatellite assignment for each individual where both data types were collected. Figure 1: Microsatellite allele frequencies observed in seven populations of G. f. 52 fuscipessampled at different time points. Numbers after location code indicate the time interval 53 (in generations) since the first sampling. [file 614721.f1.zip › 614721.f1/Appendix1.xlsx]

## Sheet: Sheet1
District	Subcounty		Village	Code	No. tsetse flies collected	Date of collection	Longitude	Latitude
Buyende	Bugaya		Bugaya trading centre	BY	0	2011-09-01	33.3473	1.09385
			Nakabiro	NAK	0	2011-09-01	33.1798	1.12937
	Kagulu		Irundu	IRU	0	2011-09-01	33.3561	1.2268
	Kagulu		Dongi	DON	0	2011-09-01	33.3997	1.20311
Buyikwe	Najja		Gaba	BWE	0	2011-03-01	26950	515161
Jinja	Budondo		Buyala c	JJA	0	2011-03-01	57052	513822
Kayunga	Bale		Misanga C	KAY	0	2011-09-01	32.9263	1.17289
			Lwabiyata	LWA	0	2011-09-01	32.942	0.98344
	Busaana		Nabuganyi	NAB	0	2011-09-01	33.0281	0.82418
			Lwabiyata	KAY	0	2011-03-01	32.942	0.98344
Kayungu	Lukaya		Kizi	KIZ	0	2011-09-01	31.8494	0.05254
			Katonga	KAT	0	2011-09-01	32.0116	0.03001
Luuka	Luuka		Kiyunga (Nairika)	LU	0	2011-09-01	33.3245	0.80798
Luwero	Wobulenzi		Nkampa	LW	0	March 2011	80456	444856
			Bukalasa	BKA	0	2011-03-01	79537	446360
	Butuntuntumula		River Lugogo	RL	0	2011-09-01	32.3616	0.96124
			Kizo	KZO	0	2011-09-01	32.6945	0.99377
Mukono	Kasawo		Kiyagi	KIY	0	2011-03-01	68087	478833
			Kitunku	KIT	0	2011-03-01	73123	478566
			Ssinda	SSI	0	2011-03-01	73993	485387
	Nagogie		Namataba	MN	0	2011-03-01	46926	484836
Nakaseke	Wakyato		Nabisojjo	NAK	0	2011-09-01	32.169	0.92738
Wakiso	Busukuma		Kabanyolo	KAB	0	2011-03-01	57093	459199
	Entebbe TC		Jahazi Grill	WAK	0	2011-03-01	9094	442712
Masindi	Masindi port		Masindi port	MSP	0	2011-07-01	32.0888	1.69365
		Areas with fly catches
Kayunga	Busana		Nabagaangi	NA	1	2011-03-01	91438	503015
Nakasogola			Kafu	KF	30	2010-02-01	32.0406	1.54218
				KF	4	2011-07-01	32.0406	1.54218
Kiryandongo			Karuma	KR	152	2010-02-01	32.2397	2.24266
				KR	130	2011-07-01	32.2397	2.24266
Pallisa			Putiputi	PT	34	2009-10-01	33.7969	1.14881
Tororo			Tororo	TR	2	2009-10-01	34.0969	0.39189
Iganga			Iganga	IGG	80	2011-02-01	33.5861	0.731167
Tororo			Kisoko	KIS	12	2011-02-01	34.17	0.82757
Mayuge			Mayuge	MGG	83	2011-02-01	33.4558	0.422183
Namutumba	Kisuba		Namutumba	NAM	150	2010	33.7406	0.84504
Tororo			Nambogo	NB	17	2011-06-01	34.059	0.59177
Busia			Sangalo	SA	188	2011-12-01	33.9929	0.24204
Tororo			Tuba	TB	28	2011-06-01	34.0586	0.59159
Dokolo	Dokolo		Aminakwach	AM	53	2011-07-01	33.1561	1.92434
Bukedea			Bukedea	BKD	25	2011-05-01	34.0444	1.34913
Kaberamaido			Oculoi	OC	400	2011-07-01	33.1539	1.84676
Budaka	Nabiswa		Budaka	BK	183	2011-05-01	33.8574	1.00684
Butaleja			Bunghazi	BN	32	2008-03-01	33.9768	0.93554
				BN	40	2009-03-01	33.8574	1.00684
				BN	154	2009-10-01	33.9768	0.93554
				BN	18	2011-06-01	33.9768	0.93482
Busia	Busiime		Busiime	BU	39	2008-03-01	33.9932	0.24344
				BU	40	2009-03-01	33.9932	0.24344
				BU	203	2009-10-01	33.9932	0.24344
Nakasongola			Junda	JN	40	2008-03-01	32.7247	1.33671
				JN	18	2010-01-01	32.7247	1.33671
				JN	3	2011-07-01	32.7247	1.33671
Kumi			Mukongoro	MK	40	2008-03-01	33.8933	1.34712
				MK	24	2009-03-01	33.8933	1.34712
				MK	22	2009-11-01	33.8933	1.34712
Masindi	Rukondwa		Masindi	MS	40	2008-03-01	31.691	1.6303
				MS	17	2010-01-01	31.691	1.6303
				MS	70	2011-07-01	31.691	1.6303
Busia			Okame	OK	39	2008-03-01	34.119	0.51939
				OK	40	2009-03-01	34.119	0.51939
				OK	174	2009-10-01	34.119	0.51939
Kaberamaido			Otuboi	OT	53	2008-07-01	33.2557	1.87667
				OT	223	2009-11-01	33.2557	1.87667
