# Supplementary material for: Genetically Distinct Glossina fuscipes fuscipes Populations in the Lake Kyoga Region of Uganda and Its Relevance for Human African Trypanosomiasis
Source: Biomed Res Int. 2013 Oct 2;2013:614721. doi: 10.1155/2013/614721 (PMC3807537; doi:10.1155/2013/614721)
Supplement: Supplementary file 1 — Appendix 1: Information on the study site, time of collection and number of flies caught in each site. Appendix 2: Details of microsatellite markers used in the study. Appendix 3: Per locus estimates of FIS at 18 microsatellite loci for each sampling locality. Appendix 4: Mitochondrial haplotype information, including frequencies observed across studied populations. New haplotypes recovered from this study are indicated by ∗. Appendix 5: Results of an AMOVA testing for temporal genetic structure in four populations of G. fuscipes sampled in 2008 and also in 2011. Appendix 6: Fst values for temporal samples calculated on microsatellite data. Non-significant values are in bold. Appendix 7: Microsatellite-based FST values pairwise comparison between sampling localities of G. f. fuscipes in Uganda. Appendix 8: Microsatellite-based FST values for pairwise comparisons among the three populations detected using Bayesian clustering. Appendix 9: Details of all first generation migrants detected by Geneclass 2.0, using Lh, Lh/Lmax and STRUCTURE. Appendix 10: Comparison of mtDNA clade and microsatellite assignment for each individual where both data types were collected. Figure 1: Microsatellite allele frequencies observed in seven populations of G. f. 52 fuscipessampled at different time points. Numbers after location code indicate the time interval 53 (in generations) since the first sampling. [file 614721.f1.zip › 614721.f1/Appendix2.xlsx]

## Sheet: Sheet1
Locus	Primer	Primer sequence	Source
GmmA06	GmmA06F	ACTTCCATGTTATGTTCGTTGC	Hyseni et al. 2011
	GmmA06R	TGCCTTAGTTGAGAAACTCTGC
GmmB20	GmmB20F	AAATGCATGTCTAACTGTCCG	Hyseni et al. 2011
	GmmB20R	AGCAAAAGGCAACTAAAGTGATG
GmmD15	GmmD15F	ACTGCATCTGCCTCTGTCG	Hyseni et al. 2011
	GmmD15R	TGAACGAGAAAATGTGAATGGTAAG
GmmL03	GmmL03F	ACAGTCCAATTTTCGCCCG	Hyseni et al. 2011
	GmmL03R	GGCCAACAATGTCATAAACCG
GmmL11	GmmL11F	CCACCACTAACAACGACAGC	Hyseni et al. 2011
	GmmL11R	TGGCTGGTTACAAGATTGCAC
A03	A03bF	AGGAATCAGTTAGTCTTCTGC	Brown et al. 2008
	A03bR	ACTCGACCTCATCTATTCTG
B05	B05F	CGCGCTTAGCTAGGAAACTC	Abila et al. 2008
	B05R	AACGATTTGCTGTCCTCGAT
C07	C07Fm13b	*GAATTTTAACAAATTGGACTTACAGA	Beadell et al. 2010
	C07Rb	CCAGGTTAAAACCAGTAACTTCC
D05	D05F	TTTCCTTCCAGACGAACTG	Abila et al. 2008
	D05R	CTTGGTATGGTCGTACATGG
D101	D101F	TGCCTTTACACTGCATACTACC	Abila et al. 2008
	D101R	AAAAAGAGGAGCAATGATGTG
Gmm8	Gmm8Fm13	*CGCGCTTCAATGTTTGCTTTC	Baker et al. 2001
	Gmm8R	TGCAGATGCAATGCGGAGAG
GmsCAG29B	GmsCAG29BFm13	*AACTATTGCTGGGCTCAC	Baker et al. 2001
	GmsCAG29BRgff	AATTTCACTTCCACTCACCG
GpB20b	GpB20bFgffm13	*CAAAAGGGGAAAAGAAAGAAAGAGT	Ouma et al. 2003
	GPB20bR2	GTTTCGGCAGTAGATGGCAA
GpCAG133	GpCAG133F	ATTTTTGCGTCAACGTGA	Baker et al. 2001
	GpCAG133R	ATGAGGATGTTGTCCAGTTT
GpC5b	GpC5bFgffm13	*GGATATGCGAACCTATACGC	Ouma et al. 2003
	GpC5bR	CAAGGGTGTGTCGTCTTC
GpC10b	GpC10bFgffm13	*TTCAAGCACACTATTGCCAC	Ouma et al. 2003
	GpC10bR	GCTGGCAAAGAAACTATTGA
Pgp17	Pgp17Fm13	*TGGCAAACTCTTCCATGTTT	Luna et al. 2001
	Pgp17Rgff	GCTTACGTGAATCGTATCGAAT
Pgp28	Pgp28Fm13	*TCAAATTGTTCCCATCAAGGA	Luna et al. 2001
	Pgp28R	ATCGTTTTTAAAGGGTTTTAAGTTT
