# Supplementary material for: Genetically Distinct Glossina fuscipes fuscipes Populations in the Lake Kyoga Region of Uganda and Its Relevance for Human African Trypanosomiasis
Source: Biomed Res Int. 2013 Oct 2;2013:614721. doi: 10.1155/2013/614721 (PMC3807537; doi:10.1155/2013/614721)
Supplement: Supplementary file 1 — Appendix 1: Information on the study site, time of collection and number of flies caught in each site. Appendix 2: Details of microsatellite markers used in the study. Appendix 3: Per locus estimates of FIS at 18 microsatellite loci for each sampling locality. Appendix 4: Mitochondrial haplotype information, including frequencies observed across studied populations. New haplotypes recovered from this study are indicated by ∗. Appendix 5: Results of an AMOVA testing for temporal genetic structure in four populations of G. fuscipes sampled in 2008 and also in 2011. Appendix 6: Fst values for temporal samples calculated on microsatellite data. Non-significant values are in bold. Appendix 7: Microsatellite-based FST values pairwise comparison between sampling localities of G. f. fuscipes in Uganda. Appendix 8: Microsatellite-based FST values for pairwise comparisons among the three populations detected using Bayesian clustering. Appendix 9: Details of all first generation migrants detected by Geneclass 2.0, using Lh, Lh/Lmax and STRUCTURE. Appendix 10: Comparison of mtDNA clade and microsatellite assignment for each individual where both data types were collected. Figure 1: Microsatellite allele frequencies observed in seven populations of G. f. 52 fuscipessampled at different time points. Numbers after location code indicate the time interval 53 (in generations) since the first sampling. [file 614721.f1.zip › 614721.f1/Appendix4.xlsx]

## Sheet: Sheet1
Haplotype ID	Population	Frequency	GenBank no.
42	SA	1	GU296787*
43	SA	1	GU296788*
44	SA	1	GU296789*
45	KAY	1	GU296790*
46	TB	1	GU296791*
47	BN	1	GU296792*
47	BKD	2	GU296792*
47	TB	1	GU296792*
48	MGG	1	GU296793*
48	NB	1	GU296793*
49	BN	2	GU296794*
49	AM	1	GU296794*
49	BKD	3	GU296794*
49	OC	7	GU296794*
50	BKD	1	GU296795*
51	BKD	1	GU296796*
52	OT	1	GU296797*
53	KT	1	GU296798*
54	BKD	1	GU296799*
55	OC	1	GU296800*
56	MS	1	GU296801*
57	KF	2	GU296802*
57	KR	2	GU296802
1	KZ	1	GU296746
2	KK	1	GU296747
3	KK	3	GU296748
4	NA	6	GU296749
5	KZ	4	GU296750
6	KK	1	GU296751
7	KZ	1	GU296752
7	KK	10	GU296752
8	BV	2	GU296753
9	BV	4	GU296754
10	MS	7	GU296755
11	BV	2	GU296756
11	NAM	1	GU296756
11	MGG	1	GU296756
12	JN	2	GU296757
12	NAM	4	GU296757
13	KB	1	GU296758
14	KB	1	GU296759
15	BU	8	GU296760
16	OK	1	GU296761
17	ND	15	GU296762
18	OK	5	GU296763
19	MGG	11	GU296764
19	NAM	19	GU296764
19	NB	13	GU296764
19	IGG	10	GU296764
19	SA	13	GU296764
19	TB	13	GU296764
19	BN	2	GU296764
19	BU	26	GU296764
19	BV	7	GU296764
19	KB	13	GU296764
19	NA	9	GU296764
19	OK	27	GU296764
20	OG	1	GU296765
21	BG	5	GU296766
21	AM	4	GU296766
21	BKD	2	GU296766
21	NAM	1	GU296766
21	OT	5	GU296766
21	BN	6	GU296766
21	MK	19	GU296766
21	DK	3	GU296766
22	OG	1	GU296767
23	AP	2	GU296768
23	OG	1	GU296768
24	AP	1	GU296769
25	KT	1	GU296770
26	AP	1	GU296771
26	OG	1	GU296771
27	AP	7	GU296772
27	AM	11	GU296772
27	BKD	4	GU296772
27	KT	4	GU296772
27	NAM	6	GU296772
27	OT	14	GU296772
27	OC	7	GU296772
27	BG	2	GU296772
27	BN	24	GU296772
27	MK	14	GU296772
27	OG	5	GU296772
27	PD	9	GU296772
27	DK	10	GU296772
28	KU	1	GU296773
29	KU	2	GU296774
30	BN	2	GU296775
30	KU	12	GU296775
30	KT	4	GU296775
30	MY	2	GU296775
31	AP	1	GU296776
32	MS	22	GU296777
33	AR	2	GU296778
33	MY	4	GU296778
34	AR	3	GU296779
35	AR	1	GU296780
36	KR	2	GU296781
36	KT	3	GU296781
36	OC	1	GU296781
36	AP	3	GU296781
36	AR	9	GU296781
36	MF	1	GU296781
36	MY	9	GU296781
36	OG	1	GU296781
36	PD	1	GU296781
36	DK	2	GU296781
37	BG	6	GU296782
37	JN	15	GU296782
37	KF	16	GU296782
37	KR	5	GU296782
37	MF	13	GU296782
38	MF	1	GU296783
39	LR	2	GU296784
40	LR	7	GU296785
41	LR	1	GU296786
