# Supplementary material for: Genetically Distinct Glossina fuscipes fuscipes Populations in the Lake Kyoga Region of Uganda and Its Relevance for Human African Trypanosomiasis
Source: Biomed Res Int. 2013 Oct 2;2013:614721. doi: 10.1155/2013/614721 (PMC3807537; doi:10.1155/2013/614721)
Supplement: Supplementary file 1 — Appendix 1: Information on the study site, time of collection and number of flies caught in each site. Appendix 2: Details of microsatellite markers used in the study. Appendix 3: Per locus estimates of FIS at 18 microsatellite loci for each sampling locality. Appendix 4: Mitochondrial haplotype information, including frequencies observed across studied populations. New haplotypes recovered from this study are indicated by ∗. Appendix 5: Results of an AMOVA testing for temporal genetic structure in four populations of G. fuscipes sampled in 2008 and also in 2011. Appendix 6: Fst values for temporal samples calculated on microsatellite data. Non-significant values are in bold. Appendix 7: Microsatellite-based FST values pairwise comparison between sampling localities of G. f. fuscipes in Uganda. Appendix 8: Microsatellite-based FST values for pairwise comparisons among the three populations detected using Bayesian clustering. Appendix 9: Details of all first generation migrants detected by Geneclass 2.0, using Lh, Lh/Lmax and STRUCTURE. Appendix 10: Comparison of mtDNA clade and microsatellite assignment for each individual where both data types were collected. Figure 1: Microsatellite allele frequencies observed in seven populations of G. f. 52 fuscipessampled at different time points. Numbers after location code indicate the time interval 53 (in generations) since the first sampling. [file 614721.f1.zip › 614721.f1/Appendix9.xlsx]

## Sheet: Sheet1
Sex	Geographic Site (origin)	Site (assigned)	Lh p-value	Lh/Lmax p-value	STRUCTURE Q value	Haplotype Type	Bayesian Cluster
						(Site of origin)	(site assigned)
F	AM11e046	OC	0.007	0.007		N	N
F	AM11e046	OT	0.004			N	N
F	BK09045	PT	0.002	0.006		N	N
F	BK09045	OT	0.005			N	N
F	BN11-0058	KF/KR			0.988	N	W
M	BN706	KF/KR			0.893	N	W
F	BN805	MK	0.005	0.006		N	N
F	BN805	OT		0.009		N	N
F	BN805	BKD	0.005			N	N
F	BN805	PT	0.003			N	N
F	BN805	BK	0.008			N	N
F	BN805	NAM	0	0		N	S
M	BU09e0744	SA	0	0.001		S	S
M	BU09e0744	MGG	0			S	S
F	IGG11-242	NB	0.001		0.845	S	S
F	IGG11-242	BU	0.001			S	S
F	IGG11-242	MGG	0.001			S	S
F	IGG11-242	SA	0.005			S	S
M	JN11e003				0.718	S/W	S
F	JN9	NAM	0	0		S/W	S
F	JN9	IGG	0.001			S/W	S
F	JN9	OK	0.006			S/W	S
M	KF10e1256	JN	0.001			W	S/W
M	KF10e1256	KR	0	0		W	W
M	KF10e1256	MS	0.001			W	W
M	KR101223	NB	0.004			W	S
M	KR101223	KF	0.003	0.01		W	W
F	KT11e001				0.798	N	W
M	KT11e019	BKD		0.002		N	N
M	KT11e019	KR	0.003	0.002		N	S/W
M	MGG11_314	IGG	0.004			S	S
M	MGG11_314	TR	0.003			S	S
M	MGG11_314	NAM	0.003			S	S
M	MGG11_314	BU	0.009			S	S
F	MK09e1054	PT	0.004	0.007		N	N
F	MK09e1054	BKD	0	0.008		N	N
F	MK09e1054	BK	0.001	0		N	N
F	MS11e1110	BU/OK/SA			0.724	S/W	S
F	MS607	BU		0		S/W	S
F	MS607	MGG	0			S/W	S
F	MS607	JN	0	0.003		S/W	S/W
F	MS607	KF	0			S/W	S/W
M	NAM11_159				0.986	S	S/W
M	NAM11_171	IGG		0.004		S	S
M	NAM11_171	TR	0.003			S	S
M	NAM11_171	OK	0.001			S	S
M	NAM11_171	MGG	0			S	S
M	NAM11_171	KR		0		S	W
M	NB11_0060	TB	0	0		S	S
M	NB11_0060	IGG	0.005			S	S
M	NB11_0060	OK	0.006			S	S
M	NB11_0060	MGG	0.009			S	S
M	OC12e020	AM	0			N	N
M	OC12e020	OT	0.006			N	N
F	OK903	SA		0.004		S	S
F	OK903	NB	0			S	S
F	OK903	BU	0			S	S
F	OT09e0998	AM	0.003			N	N
F	OT09e0998	OC	0.002			N	N
F	OT09e0998	BKD	0.002			N	N
M	PT09e0480	BK	0.002			N	N
M	SA11e015	NAM	0.001			S	S
M	SA11e015	BU	0.002			S	S
M	TB11_0013				0.764	S	S/W
M	TB11_0051	NB	0.002			S	S
M	TB11_0051	SA	0.003			S	S
F	TR09e1275	OK	0.001	0.004		S	S
F	TR09e1275	IGG	0			S	S
F	TR09e1275	TB	0.003			S	S
