# Supplementary material for: Genetically Distinct Glossina fuscipes fuscipes Populations in the Lake Kyoga Region of Uganda and Its Relevance for Human African Trypanosomiasis
Source: Biomed Res Int. 2013 Oct 2;2013:614721. doi: 10.1155/2013/614721 (PMC3807537; doi:10.1155/2013/614721)
Supplement: Supplementary file 1 — Appendix 1: Information on the study site, time of collection and number of flies caught in each site. Appendix 2: Details of microsatellite markers used in the study. Appendix 3: Per locus estimates of FIS at 18 microsatellite loci for each sampling locality. Appendix 4: Mitochondrial haplotype information, including frequencies observed across studied populations. New haplotypes recovered from this study are indicated by ∗. Appendix 5: Results of an AMOVA testing for temporal genetic structure in four populations of G. fuscipes sampled in 2008 and also in 2011. Appendix 6: Fst values for temporal samples calculated on microsatellite data. Non-significant values are in bold. Appendix 7: Microsatellite-based FST values pairwise comparison between sampling localities of G. f. fuscipes in Uganda. Appendix 8: Microsatellite-based FST values for pairwise comparisons among the three populations detected using Bayesian clustering. Appendix 9: Details of all first generation migrants detected by Geneclass 2.0, using Lh, Lh/Lmax and STRUCTURE. Appendix 10: Comparison of mtDNA clade and microsatellite assignment for each individual where both data types were collected. Figure 1: Microsatellite allele frequencies observed in seven populations of G. f. 52 fuscipessampled at different time points. Numbers after location code indicate the time interval 53 (in generations) since the first sampling. [file 614721.f1.zip › 614721.f1/Appendix10.xls]

## Sheet: BK
AM11e001	0.006	0.989	0.005
AM11e002	0.005	0.9863	0.0087
AM11e003	0.006	0.982	0.012
AM11e004	0.005	0.9677	0.0273
AM11e005	0.006	0.8407	0.1533
AM11e006	0.0047	0.9853	0.01
AM11e008	0.025	0.967	0.008
AM11e009	0.008	0.987	0.005
AM11e010	0.0127	0.956	0.0313
AM11e013	0.004	0.99	0.006
AM11e014	0.007	0.983	0.01
AM11e015	0.0053	0.9783	0.0163
AM11e016	0.008	0.9757	0.0163
AM11e017	0.0073	0.9797	0.013
AM11e022	0.005	0.991	0.004
AM11e024	0.005	0.991	0.004
AM11e0251	0.02	0.97	0.01
AM11e025	0.008	0.9723	0.0197
AM11e026	0.013	0.9367	0.0503
AM11e027	0.0053	0.97	0.0247
AM11e028	0.005	0.98	0.015
AM11e029	0.016	0.8893	0.0947
AM11e031	0.004	0.989	0.007
AM11e036	0.011	0.972	0.017
AM11e037	0.007	0.9857	0.0073
AM11e038	0.0063	0.9847	0.009
AM11e039	0.011	0.9833	0.0057
AM11e040	0.0663	0.9277	0.006
AM11e041	0.017	0.9684	0.0147
AM11e046	0.009	0.987	0.004
BK00001	0.004	0.991	0.005
BK00002	0.0083	0.9787	0.013
BK00003	0.0327	0.947	0.0203
BK00004	0.0536	0.9367	0.0097
BK00005	0.0247	0.7613	0.2141
BK00006	0.012	0.9797	0.0083
BK00007	0.03	0.9567	0.0133
BK00008	0.007	0.983	0.01
BK00009	0.0247	0.929	0.0463
BK00010	0.0683	0.8684	0.0633
BK00011	0.018	0.873	0.109
BK00012	0.1471	0.8449	0.008
BK00013	0.048	0.939	0.013
BK00014	0.006	0.9853	0.0087
BK00015	0.015	0.963	0.022
BK00016	0.0073	0.9887	0.004
BK00017	0.009	0.977	0.014
BK00018	0.011	0.976	0.013
BK00019	0.04	0.949	0.011
BK00020	0.006	0.98	0.014
BK00021	0.006	0.987	0.007
BK00022	0.0123	0.9757	0.012
BK00023	0.083	0.8107	0.1063
BK00024	0.1457	0.8329	0.0213
BK00025	0.004	0.992	0.004
BK00026	0.005	0.985	0.01
BK00027	0.018	0.968	0.014
BK00028	0.308	0.687	0.005
BK00029	0.115	0.875	0.01
BK00030	0.009	0.986	0.005
BK00031	0.004	0.9893	0.0067
BK00032	0.007	0.989	0.004
BK00033	0.004	0.992	0.004
BK00034	0.0427	0.8717	0.0856
BK00035	0.0163	0.9777	0.006
BK00036	0.007	0.987	0.006
BK00037	0.09	0.8514	0.0586
BK00038	0.009	0.983	0.008
BK00039	0.004	0.98	0.016
BK00040	0.0253	0.906	0.0687
BK00041	0.0303	0.9503	0.0193
BK00042	0.1406	0.8434	0.016
BK00043	0.024	0.966	0.01
BK00044	0.009	0.987	0.004
BK00045	0.0207	0.9023	0.077
BK00046	0.0077	0.9747	0.0177
BK00047	0.014	0.977	0.009
BK00048	0.0127	0.9803	0.007
BK00049	0.0107	0.98	0.0093
BK00050	0.014	0.977	0.009
BK00051	0.015	0.9377	0.0473
BK00052	0.0127	0.9823	0.005
BK00053	0.2227	0.7723	0.005
BK00054	0.2551	0.7152	0.0297
BK00055	0.1554	0.7488	0.0957
BK00056	0.004	0.99	0.006
BK00057	0.017	0.975	0.008
BK00058	0.03	0.9456	0.0243
BK00059	0.004	0.993	0.003
BK00060	0.0203	0.9707	0.009
BK00061	0.0956	0.8887	0.0157
BK00062	0.01	0.986	0.004
BK00063	0.004	0.992	0.004
BK00064	0.004	0.992	0.004
BK00065	0.065	0.8717	0.0633
BK00066	0.014	0.9787	0.0073
BK00067	0.1763	0.8017	0.022
BK00068	0.004	0.991	0.005
BK00069	0.0157	0.9763	0.008
BK00070	0.027	0.9237	0.0493
BK00071	0.007	0.985	0.008
BK00072	0.005	0.99	0.005
BK00073	0.014	0.981	0.005
BK00074	0.051	0.938	0.011
BK00075	0.005	0.985	0.01
BK00076	0.041	0.9257	0.0333
BK00077	0.1533	0.821	0.0257
BK00078	0.017	0.979	0.004
BK00079	0.022	0.973	0.005
BK00080	0.055	0.9147	0.0303
BKD11e001	0.004	0.9877	0.0083
BKD11e002	0.005	0.991	0.004
BKD11e003	0.012	0.984	0.004
BKD11e004	0.0063	0.9897	0.004
BKD11e005	0.0123	0.9773	0.0103
BKD11e006	0.007	0.983	0.01
BKD11e007	0.016	0.972	0.012
BKD11e008	0.0047	0.991	0.0043
BKD11e009	0.004	0.992	0.004
BKD11e010	0.01	0.973	0.017
BKD11e0111	0.005	0.987	0.008
BKD11e011	0.071	0.912	0.017
BKD11e013	0.004	0.992	0.004
BKD11e014	0.004	0.9817	0.0143
BKD11e015	0.003	0.994	0.003
BKD11e016	0.004	0.992	0.004
BKD11e017	0.004	0.988	0.008
BKD11e018	0.006	0.98	0.014
BKD11e019	0.007	0.985	0.008
BKD11e020	0.009	0.9597	0.0313
BKD11e021	0.004	0.991	0.005
BKD11e022	0.0143	0.9793	0.0063
BKD11e023	0.0067	0.9833	0.01
BKD11e024	0.004	0.992	0.004
BKD11e025	0.006	0.983	0.011
BN00001	0.1367	0.8483	0.015
BN00002	0.2898	0.6512	0.059
BN00003	0.2087	0.5177	0.2737
BN00004	0.1627	0.7777	0.0597
BN00005	0.0233	0.9673	0.0093
BN00006	0.023	0.971	0.006
BN00007	0.2784	0.7069	0.0147
BN00008	0.01	0.984	0.006
BN00009	0.049	0.944	0.007
BN00010	0.0779	0.7885	0.1336
BN00011	0.003	0.004	0.993
BN00012	0.061	0.919	0.02
BN00013	0.2284	0.6776	0.094
BN00014	0.0417	0.9484	0.01
BN00015	0.2077	0.7853	0.007
BN00016	0.227	0.7387	0.0343
BN00017	0.2745	0.7195	0.006
BN00018	0.1627	0.7536	0.0837
BN00019	0.134	0.8273	0.0387
BN00020	0.0197	0.973	0.0073
BN00021	0.2037	0.7793	0.017
BN00022	0.054	0.94	0.006
BN00023	0.0073	0.9857	0.007
BN00024	0.053	0.8756	0.0714
BN00025	0.0287	0.9623	0.009
BN00026	0.3816	0.5911	0.0274
BN00027	0.4198	0.5325	0.0477
BN00028	0.4445	0.5402	0.0153
BN00029	0.019	0.96	0.021
BN00030	0.1617	0.8119	0.0263
BN00031	0.0327	0.9313	0.036
BN00032	0.0133	0.9817	0.005
BN00033	0.3306	0.6495	0.02
BN00034	0.027	0.9464	0.0267
BN00035	0.0544	0.9316	0.014
BN00036	0.1824	0.8066	0.011
BN00037	0.1643	0.7047	0.131
BN00038	0.1174	0.8726	0.01
BN00039	0.0083	0.9747	0.017
BN00040	0.3785	0.6135	0.008
BN00041	0.1743	0.7348	0.091
BN00042	0.006	0.99	0.004
BN00043	0.011	0.983	0.006
BN00044	0.1753	0.7773	0.0473
BN00045	0.1506	0.8391	0.0103
BN00046	0.1577	0.8143	0.028
BN00047	0.2814	0.5899	0.1287
BN00048	0.128	0.8346	0.0373
BN00049	0.2909	0.6764	0.0327
BN00050	0.2736	0.7204	0.006
BN00051	0.298	0.6713	0.0307
BN00052	0.1327	0.8247	0.0427
BN00053	0.0427	0.9453	0.012
BN00054	0.2867	0.679	0.0343
BN00055	0.7683	0.2187	0.013
BN00056	0.011	0.979	0.01
BN00057	0.1787	0.8079	0.0133
BN00058	0.172	0.8217	0.0063
BN00059	0.061	0.931	0.008
BN00060	0.3939	0.5915	0.0147
BN00061	0.3109	0.6371	0.052
BN00062	0.125	0.6777	0.1973
BN00063	0.0976	0.8497	0.0526
BN00064	0.211	0.6103	0.1787
BN00065	0.0587	0.9333	0.008
BN00066	0.5443	0.4427	0.013
BN00067	0.2133	0.7637	0.023
BN00068	0.1272	0.8484	0.0243
BN00069	0.1849	0.7667	0.0483
BN00070	0.1087	0.7803	0.111
BN00071	0.0737	0.8767	0.0497
BN00072	0.0457	0.9403	0.014
BN00073	0.048	0.7237	0.2283
BN00074	0.3407	0.6473	0.012
BN00075	0.3698	0.6062	0.024
BN00076	0.004	0.991	0.005
BN00077	0.0446	0.9454	0.01
BN00078	0.0983	0.8473	0.0543
BN00079	0.0243	0.9364	0.0393
BN00080	0.0293	0.9553	0.0153
BN00081	0.137	0.7827	0.0803
BN00082	0.2681	0.7109	0.021
BN00083	0.0707	0.8983	0.031
BN00084	0.0707	0.9017	0.0277
BN00085	0.1697	0.7983	0.032
BN00086	0.096	0.893	0.011
BN00087	0.01	0.982	0.008
BN00088	0.0477	0.9353	0.017
BN00089	0.3551	0.6372	0.0077
BN00090	0.0393	0.945	0.0157
BN00091	0.217	0.772	0.011
BN00092	0.2823	0.682	0.0357
BN00093	0.062	0.8986	0.0393
BN00094	0.409	0.5443	0.0467
BN00095	0.054	0.9057	0.0403
BN00096	0.0783	0.37	0.5517
BN00097	0.1346	0.8487	0.0167
BN00098	0.5368	0.4359	0.0273
BN00099	0.0223	0.9677	0.01
BN00100	0.0614	0.9313	0.0073
BN00101	0.2587	0.6587	0.0827
BN00102	0.0457	0.9453	0.009
BN00103	0.008	0.9863	0.0057
BN00104	0.0073	0.9847	0.008
BN00105	0.2279	0.7144	0.0576
BN00106	0.4445	0.4652	0.0903
BN00107	0.0573	0.7787	0.164
BN00108	0.1721	0.7583	0.0697
BN00109	0.4223	0.5667	0.011
BN00110	0.1363	0.8557	0.008
BN00111	0.066	0.8393	0.0947
BN00112	0.019	0.968	0.013
BN00113	0.0437	0.8537	0.1027
BN00114	0.211	0.773	0.016
BN00115	0.0593	0.9077	0.033
BN00116	0.011	0.984	0.005
BN00117	0.026	0.934	0.04
BN00118	0.243	0.746	0.011
BN00119	0.5647	0.4137	0.0217
BN00120	0.0217	0.9553	0.023
BN00121	0.029	0.959	0.012
BN00122	0.0087	0.982	0.0093
BN00123	0.526	0.4447	0.0293
BN00124	0.4983	0.4413	0.0603
BN00125	0.1403	0.8224	0.0373
BN00126	0.4003	0.5947	0.005
BN00127	0.006	0.9623	0.0317
BN00128	0.005	0.9907	0.0043
BN00129	0.0123	0.9643	0.0233
BN00130	0.0543	0.901	0.0447
BN00131	0.0823	0.561	0.3568
BN00132	0.0503	0.915	0.0347
BN00133	0.12	0.867	0.013
BN00134	0.4605	0.5212	0.0183
BN00135	0.015	0.976	0.009
BN00136	0.004	0.991	0.005
BN00137	0.5162	0.4435	0.0403
BN00138	0.086	0.887	0.027
BN00139	0.0713	0.9237	0.005
BN00140	0.038	0.698	0.264
BN00141	0.0834	0.9066	0.01
BN00142	0.2514	0.5075	0.2411
BN00143	0.068	0.8002	0.1318
BN00144	0.2707	0.702	0.0273
BN00145	0.1473	0.7061	0.1466
BN00146	0.0407	0.9507	0.0087
BN00147	0.1417	0.795	0.0633
BN00148	0.053	0.9393	0.0077
BN00149	0.3469	0.6331	0.02
BN00150	0.0397	0.9493	0.011
BN00151	0.017	0.95	0.033
BN00152	0.5158	0.4628	0.0213
BN00153	0.4453	0.514	0.0407
BN00154	0.0274	0.9586	0.014
BU00001	0.981	0.009	0.01
Bu00002	0.991	0.003	0.006
BU00003	0.986	0.008	0.006
BU00004	0.982	0.005	0.013
BU00005	0.9857	0.006	0.0083
BU00006	0.967	0.0117	0.0213
BU00007	0.979	0.004	0.017
BU00008	0.9807	0.01	0.0093
BU00009	0.984	0.006	0.01
BU00010	0.986	0.003	0.011
BU00011	0.983	0.004	0.013
BU00012	0.9853	0.0067	0.008
BU00013	0.9627	0.0293	0.008
BU00014	0.991	0.005	0.004
BU00015	0.991	0.004	0.005
BU00016	0.9893	0.005	0.0057
BU00017	0.98	0.011	0.009
BU00018	0.991	0.004	0.005
BU00019	0.982	0.009	0.009
BU00020	0.9131	0.0646	0.0223
BU00021	0.97	0.005	0.025
BU00022	0.9917	0.003	0.0053
BU00023	0.9683	0.003	0.0287
BU00024	0.9837	0.004	0.0123
BU00025	0.984	0.008	0.008
BU00026	0.986	0.005	0.009
BU00027	0.99	0.004	0.006
BU00028	0.976	0.004	0.02
BU00029	0.988	0.005	0.007
BU00030	0.99	0.005	0.005
BU00031	0.984	0.006	0.01
BU00032	0.987	0.006	0.007
BU00033	0.983	0.007	0.01
BU00034	0.9837	0.0093	0.007
BU00035	0.989	0.004	0.007
BU00036	0.988	0.006	0.006
BU00037	0.9867	0.006	0.0073
BU00038	0.989	0.004	0.007
BU00039	0.988	0.004	0.008
BU00040	0.9363	0.0587	0.005
BU00041	0.984	0.01	0.006
BU00042	0.985	0.005	0.01
BU00043	0.985	0.006	0.009
BU00044	0.9777	0.008	0.0143
BU00045	0.99	0.005	0.005
BU00046	0.9577	0.0047	0.0377
BU00047	0.991	0.004	0.005
BU00048	0.9917	0.003	0.0053
BU00049	0.991	0.004	0.005
BU00050	0.984	0.008	0.008
BU00051	0.9897	0.004	0.0063
BU00052	0.977	0.009	0.014
BU00053	0.9917	0.0033	0.005
BU00054	0.969	0.024	0.007
BU00055	0.866	0.1027	0.0313
BU00056	0.984	0.006	0.01
BU00057	0.975	0.009	0.016
BU00058	0.982	0.008	0.01
BU00059	0.975	0.014	0.011
BU00060	0.99	0.003	0.007
BU00061	0.993	0.003	0.004
BU00062	0.9527	0.0353	0.012
BU00063	0.9817	0.008	0.0103
BU00064	0.9727	0.0083	0.019
BU00065	0.9827	0.0083	0.009
BU00066	0.99	0.005	0.005
BU00067	0.9813	0.0087	0.01
BU00068	0.9813	0.004	0.0147
BU00069	0.983	0.008	0.009
BU00070	0.985	0.006	0.009
BU00071	0.9726	0.004	0.0233
BU00072	0.987	0.003	0.01
BU00073	0.989	0.005	0.006
BU00074	0.981	0.007	0.012
BU00075	0.993	0.003	0.004
BU00076	0.982	0.006	0.012
BU00077	0.969	0.006	0.025
BU00078	0.986	0.005	0.009
BU00079	0.987	0.003	0.01
BU00080	0.9927	0.003	0.0043
BU00081	0.991	0.004	0.005
BU00082	0.977	0.006	0.017
BU00083	0.99	0.004	0.006
BU00084	0.988	0.007	0.005
BU00085	0.9753	0.004	0.0207
BU00086	0.985	0.007	0.008
BU00087	0.983	0.004	0.013
BU00088	0.9603	0.007	0.0327
BU00089	0.991	0.004	0.005
BU00090	0.989	0.006	0.005
BU00091	0.984	0.006	0.01
BU00092	0.993	0.003	0.004
BU00093	0.988	0.005	0.007
BU00094	0.989	0.005	0.006
BU00095	0.9883	0.005	0.0067
BU00096	0.936	0.005	0.059
BU00097	0.9647	0.007	0.0283
BU00098	0.989	0.004	0.007
BU00099	0.99	0.004	0.006
BU00100	0.991	0.004	0.005
BU00101	0.8733	0.058	0.0687
BU00102	0.952	0.0387	0.0093
BU00103	0.991	0.004	0.005
BU00104	0.99	0.004	0.006
BU00105	0.9837	0.0043	0.012
BU00106	0.991	0.004	0.005
BU00107	0.982	0.008	0.01
BU00108	0.9853	0.004	0.0107
BU00109	0.991	0.004	0.005
BU00110	0.963	0.008	0.029
BU00111	0.992	0.003	0.005
BU00112	0.988	0.006	0.006
BU00113	0.993	0.003	0.004
BU00114	0.987	0.004	0.009
BU00115	0.987	0.0063	0.0067
BU00116	0.99	0.005	0.005
BU00117	0.9743	0.0063	0.0193
BU00118	0.993	0.003	0.004
BU00119	0.992	0.004	0.004
IGG11003	0.89	0.0937	0.0163
IGG11004	0.9817	0.0103	0.008
IGG11005	0.9057	0.0506	0.0436
IGG11006	0.9807	0.0103	0.009
IGG11007	0.9647	0.004	0.0313
IGG11008	0.9803	0.005	0.0147
IGG11009	0.9873	0.0057	0.007
IGG11010	0.986	0.005	0.009
IGG11011	0.905	0.009	0.086
IGG11012	0.987	0.004	0.009
IGG11013	0.989	0.004	0.007
IGG11014	0.971	0.006	0.023
IGG11015	0.9843	0.0043	0.0113
IGG11016	0.99	0.004	0.006
IGG11017	0.991	0.003	0.006
IGG11018	0.9897	0.003	0.0073
IGG11070	0.9667	0.004	0.0293
IGG11071	0.9877	0.0063	0.006
IGG11172	0.916	0.004	0.08
IGG11173	0.971	0.01	0.019
IGG11174	0.9433	0.039	0.0177
IGG11175	0.986	0.004	0.01
IGG11176	0.976	0.009	0.015
IGG11177	0.989	0.003	0.008
IGG11178	0.9837	0.005	0.0113
IGG11179	0.988	0.007	0.005
IGG11180	0.966	0.0197	0.0143
IGG11181	0.987	0.005	0.008
IGG11182	0.9823	0.003	0.0147
IGG11183	0.9867	0.005	0.0083
IGG11184	0.986	0.005	0.009
IGG11185	0.817	0.003	0.18
IGG11186	0.9717	0.0087	0.0197
IGG11187	0.9733	0.005	0.0217
IGG11188	0.9056	0.0153	0.079
IGG11189	0.8266	0.1304	0.043
IGG11190	0.8724	0.014	0.1136
IGG11191	0.989	0.003	0.008
IGG11192	0.965	0.005	0.03
IGG11193	0.987	0.005	0.008
IGG11194	0.986	0.003	0.011
IGG11195	0.987	0.006	0.007
IGG11196	0.9907	0.004	0.0053
IGG11197	0.986	0.004	0.01
IGG11212	0.99	0.004	0.006
IGG11213	0.9697	0.004	0.0263
IGG11214	0.9513	0.006	0.0427
IGG11215	0.9783	0.007	0.0147
IGG11216	0.99	0.004	0.006
IGG11217	0.991	0.004	0.005
IGG11218	0.99	0.004	0.006
IGG11219	0.989	0.005	0.006
IGG11220	0.9857	0.004	0.0103
IGG11221	0.984	0.004	0.012
IGG11222	0.987	0.004	0.009
IGG11223	0.9867	0.006	0.0073
IGG11224	0.9793	0.004	0.0167
IGG11225	0.992	0.004	0.004
IGG11226	0.991	0.005	0.004
IGG11227	0.9777	0.0123	0.01
IGG11239	0.984	0.005	0.011
IGG11240	0.959	0.005	0.036
IGG11241	0.975	0.006	0.019
IGG11242	0.9004	0.045	0.0546
JN0001	0.8283	0.003	0.1687
JN0002	0.9617	0.015	0.0233
JN0003	0.9133	0.003	0.0837
JN0004	0.5452	0.005	0.4498
JN0005	0.7849	0.008	0.2071
JN0006	0.936	0.007	0.057
JN0007	0.4403	0.006	0.5537
JN0008	0.2434	0.007	0.7496
JN0009	0.9553	0.003	0.0417
JN0010	0.4942	0.003	0.5028
JN0011	0.5767	0.005	0.4183
JN0012	0.9447	0.0087	0.0467
JN0013	0.941	0.004	0.055
JN0014	0.386	0.004	0.61
JN0015	0.5843	0.013	0.4027
JN0016	0.1609	0.012	0.8271
JN0017	0.8423	0.0063	0.1513
JN0018	0.4973	0.004	0.4987
JN0019	0.9184	0.0093	0.0723
JN0020	0.9028	0.01	0.0872
JN0021	0.8684	0.006	0.1256
JN0022	0.6034	0.004	0.3926
JN0023	0.8943	0.005	0.1007
JN0024	0.4965	0.005	0.4985
JN0025	0.235	0.004	0.761
JN0026	0.6412	0.004	0.3548
JN0027	0.9376	0.004	0.0584
JN0028	0.498	0.007	0.495
JN0029	0.5023	0.006	0.4917
JN0030	0.6607	0.004	0.3353
JN0031	0.176	0.005	0.819
JN0032	0.1867	0.025	0.7883
JN0033	0.04	0.003	0.957
JN0034	0.5343	0.017	0.4487
JN0035	0.9787	0.006	0.0153
JN0036	0.689	0.011	0.3
JN0037	0.6897	0.003	0.3073
JN0038	0.8399	0.004	0.1561
JN0039	0.9533	0.0097	0.037
JN0040	0.923	0.003	0.074
JN0041	0.2029	0.004	0.7931
JN0042	0.9533	0.004	0.0427
JN0043	0.9127	0.028	0.0593
JN0044	0.8953	0.004	0.1007
JN0045	0.7223	0.007	0.2707
JN0046	0.9467	0.004	0.0493
JN0047	0.9683	0.007	0.0247
JN0048	0.9414	0.006	0.0526
JN0049	0.54	0.004	0.456
JN0050	0.622	0.006	0.372
JN0051	0.9316	0.005	0.0634
JN0052	0.3038	0.0247	0.6716
JN0053	0.7483	0.005	0.2468
JN0054	0.4043	0.003	0.5927
JN0055	0.8276	0.0043	0.1681
JN0056	0.946	0.006	0.048
JN0057	0.6193	0.004	0.3767
JN0058	0.9107	0.0157	0.0737
JN0059	0.8134	0.007	0.1796
JN0060	0.9367	0.01	0.0533
JN0061	0.9703	0.004	0.0257
KF0001	0.0143	0.0383	0.9473
KF0002	0.009	0.01	0.981
KF0003	0.009	0.016	0.975
KF0004	0.0327	0.004	0.9633
KF0005	0.083	0.0267	0.8903
KF0006	0.0143	0.006	0.9797
KF0007	0.008	0.004	0.988
KF0008	0.005	0.009	0.986
KF0009	0.011	0.0267	0.9623
KF0010	0.01	0.008	0.982
KF0011	0.022	0.021	0.957
KF0012	0.0097	0.005	0.9853
KF0013	0.01	0.005	0.985
KF0014	0.0093	0.0143	0.9763
KF0015	0.0273	0.021	0.9517
KF0016	0.0567	0.006	0.9373
KF0017	0.014	0.008	0.978
KF0018	0.2972	0.006	0.6968
KF0019	0.0127	0.004	0.9833
KF0020	0.326	0.004	0.67
KF0021	0.016	0.007	0.977
KF0022	0.0427	0.0093	0.948
KF0023	0.007	0.004	0.989
KF0024	0.01	0.007	0.983
KF0025	0.007	0.013	0.98
KF0026	0.01	0.1287	0.8613
KF0027	0.008	0.008	0.984
KF0028	0.008	0.005	0.987
KF0029	0.009	0.015	0.976
KF0030	0.007	0.004	0.989
KF0031	0.1604	0.016	0.8236
KF0032	0.005	0.003	0.992
KF0033	0.003	0.006	0.991
KF0034	0.075	0.005	0.92
KIS001	0.9103	0.072	0.0177
KIS002	0.991	0.004	0.005
KIS003	0.9736	0.0103	0.016
KIS004	0.988	0.003	0.009
KIS005	0.6445	0.004	0.3515
KIS006	0.987	0.007	0.006
KIS007	0.991	0.003	0.006
KIS008	0.865	0.1274	0.0077
KIS009	0.9647	0.011	0.0243
KIS010	0.984	0.004	0.012
KR0001	0.2013	0.007	0.7917
KR0002	0.0344	0.005	0.9606
KR0003	0.0197	0.0963	0.884
KR0004	0.048	0.0193	0.9327
KR0005	0.261	0.008	0.731
KR0006	0.0823	0.0177	0.9
KR0007	0.0187	0.006	0.9753
KR0008	0.0267	0.0077	0.9657
KR0009	0.008	0.2666	0.7254
KR0010	0.013	0.004	0.983
KR0011	0.0203	0.009	0.9707
KR0012	0.032	0.0237	0.9444
KR0013	0.1687	0.007	0.8243
KR0014	0.0473	0.0323	0.9204
KR0015	0.3617	0.006	0.6323
KR0016	0.005	0.005	0.99
KR0017	0.358	0.009	0.633
KR0018	0.0767	0.063	0.8603
KR0019	0.0233	0.007	0.9697
KR0020	0.043	0.007	0.95
KR0021	0.1703	0.0433	0.7863
KR0022	0.0433	0.009	0.9476
KR0023	0.6245	0.0053	0.3702
KR0024	0.008	0.099	0.893
KR0025	0.023	0.0743	0.9027
KR0026	0.019	0.008	0.973
KR0027	0.008	0.018	0.974
KR0028	0.0177	0.005	0.9773
KR0029	0.149	0.01	0.8409
KR0030	0.0567	0.006	0.9373
KR0031	0.0133	0.005	0.9817
KR0032	0.0257	0.004	0.9703
KR0033	0.2884	0.003	0.7086
KR0034	0.015	0.011	0.974
KR0035	0.015	0.0173	0.9677
KR0036	0.0153	0.1327	0.852
KR0037	0.008	0.013	0.979
KR0038	0.009	0.007	0.984
KR0039	0.007	0.004	0.989
KR0040	0.053	0.018	0.929
KR0041	0.1634	0.056	0.7806
KR0042	0.014	0.012	0.974
KR0043	0.0357	0.019	0.9453
KR0044	0.1557	0.042	0.8023
KR0045	0.015	0.024	0.961
KR0046	0.1656	0.011	0.8235
KR0047	0.011	0.017	0.972
KR0048	0.133	0.0837	0.7833
KR0049	0.1126	0.0477	0.8397
KR0050	0.0427	0.04	0.9173
KR0051	0.043	0.003	0.954
KR0052	0.0187	0.1396	0.8417
KR0053	0.0463	0.004	0.9497
KR0054	0.031	0.0563	0.9127
KR0055	0.0636	0.1216	0.8147
KR0056	0.013	0.0127	0.9743
KR0057	0.118	0.032	0.85
KR0058	0.016	0.006	0.978
KR0059	0.028	0.018	0.954
KR0060	0.006	0.0504	0.9436
KT11e001	0.017	0.1807	0.8023
KT11e002	0.0087	0.7102	0.2811
KT11e003	0.1273	0.6527	0.22
KT11e004	0.119	0.8371	0.044
KT11e005	0.02	0.6617	0.3183
KT11e006	0.098	0.8451	0.057
KT11e007	0.0047	0.9853	0.01
KT11e0111	0.0267	0.767	0.2063
KT11e011	0.0677	0.8326	0.0997
KT11e013	0.3047	0.4393	0.256
KT11e014	0.011	0.718	0.271
KT11e015	0.1347	0.5653	0.3
KT11e016	0.075	0.6407	0.2843
KT11e017	0.0467	0.5245	0.4288
KT11e0181	0.0574	0.5809	0.3618
KT11e018	0.1247	0.7456	0.1297
KT11e019	0.0323	0.6688	0.2989
MGG11002	0.965	0.006	0.029
MGG11003	0.9733	0.0117	0.015
MGG11004	0.9051	0.005	0.0899
MGG11005	0.874	0.0093	0.1167
MGG11006	0.4965	0.009	0.4945
MGG11007	0.985	0.005	0.01
MGG11008	0.965	0.014	0.021
MGG11009	0.7933	0.1977	0.009
MGG11010	0.9623	0.006	0.0317
MGG11011	0.987	0.008	0.005
MGG11012	0.988	0.003	0.009
MGG11013	0.99	0.005	0.005
MGG11014	0.967	0.005	0.028
MGG11072	0.2973	0.006	0.6967
MGG11073	0.9387	0.003	0.0583
MGG11074	0.985	0.008	0.007
MGG11198	0.8326	0.1434	0.024
MGG11199	0.9897	0.0043	0.006
MGG11200	0.9233	0.0493	0.0273
MGG11201	0.991	0.004	0.005
MGG11202	0.97	0.0057	0.0243
MGG11203	0.8737	0.0793	0.047
MGG11204	0.912	0.007	0.081
MGG11205	0.9757	0.0163	0.008
MGG11206	0.9897	0.003	0.0073
MGG11207	0.982	0.004	0.014
MGG11208	0.987	0.008	0.005
MGG11209	0.983	0.01	0.007
MGG11210	0.9907	0.003	0.0063
MGG11211	0.9007	0.045	0.0543
MGG11228	0.9887	0.005	0.0063
MGG11229	0.985	0.007	0.008
MGG11230	0.807	0.1537	0.0393
MGG11231	0.976	0.0063	0.0177
MGG11232	0.986	0.005	0.009
MGG11233	0.988	0.005	0.007
MGG11234	0.9863	0.007	0.0067
MGG11235	0.9773	0.005	0.0177
MGG11236	0.981	0.005	0.014
MGG11237	0.937	0.008	0.055
MGG11238	0.989	0.006	0.005
MGG11244	0.987	0.006	0.007
MGG11245	0.9893	0.0047	0.006
MGG11246	0.9803	0.0057	0.014
MGG11247	0.981	0.004	0.015
MGG11301	0.982	0.005	0.013
MGG11302	0.988	0.005	0.007
MGG11303	0.989	0.004	0.007
MGG11304	0.981	0.01	0.009
MGG11305	0.8439	0.008	0.148
MGG11306	0.9867	0.0043	0.009
MGG11307	0.943	0.01	0.047
MGG11308	0.99	0.004	0.006
MGG11309	0.941	0.006	0.053
MGG11310	0.986	0.006	0.008
MGG11311	0.986	0.005	0.009
MGG11312	0.9383	0.009	0.0527
MGG11313	0.9694	0.019	0.0117
MGG11314	0.9797	0.006	0.0143
MK0001	0.004	0.992	0.004
MK0002	0.003	0.993	0.004
MK0003	0.005	0.99	0.005
MK0004	0.007	0.987	0.006
MK0005	0.004	0.9927	0.0033
MK0006	0.004	0.991	0.005
MK0007	0.004	0.993	0.003
MK0008	0.005	0.99	0.005
MK0009	0.005	0.992	0.003
MK0010	0.003	0.994	0.003
MK0011	0.007	0.985	0.008
MK0012	0.005	0.9897	0.0053
MK0013	0.004	0.993	0.003
MK0014	0.004	0.9927	0.0033
MK0015	0.004	0.991	0.005
MK0016	0.004	0.992	0.004
MK0017	0.004	0.992	0.004
MK0018	0.004	0.991	0.005
MK0019	0.003	0.993	0.004
MK0020	0.004	0.973	0.023
MK0021	0.004	0.99	0.006
MK0022	0.005	0.992	0.003
MK0023	0.004	0.993	0.003
MK0024	0.004	0.992	0.004
MK0025	0.005	0.991	0.004
MK0026	0.005	0.983	0.012
MK0027	0.003	0.994	0.003
MK0028	0.004	0.985	0.011
MK0029	0.003	0.994	0.003
MK0030	0.004	0.993	0.003
MK0031	0.004	0.993	0.003
MK0032	0.004	0.993	0.003
MK0033	0.004	0.992	0.004
MK0034	0.004	0.993	0.003
MK0035	0.004	0.993	0.003
MK0036	0.004	0.992	0.004
MK0037	0.006	0.988	0.006
MK0038	0.004	0.991	0.005
MK0039	0.003	0.993	0.004
MK0040	0.005	0.991	0.004
MK0041	0.003	0.994	0.003
MK0042	0.005	0.992	0.003
MK0043	0.006	0.99	0.004
MK0044	0.003	0.9933	0.0037
MK0045	0.005	0.9917	0.0033
MK0046	0.003	0.993	0.004
MK0047	0.003	0.994	0.003
MK0048	0.004	0.9923	0.0037
MK0049	0.006	0.99	0.004
MK0050	0.016	0.974	0.01
MK0051	0.009	0.9857	0.0053
MK0052	0.004	0.993	0.003
MK0053	0.0043	0.9917	0.004
MK0054	0.0083	0.9847	0.007
MK0055	0.004	0.993	0.003
MK0056	0.004	0.993	0.003
MK0057	0.006	0.99	0.004
MK0058	0.004	0.992	0.004
MK0059	0.005	0.991	0.004
MK0060	0.0043	0.9917	0.004
MK0061	0.006	0.989	0.005
MK0062	0.005	0.991	0.004
MK0063	0.004	0.992	0.004
MK0064	0.003	0.993	0.004
MK0065	0.004	0.991	0.005
MK0066	0.005	0.992	0.003
MK0067	0.008	0.986	0.006
MK0068	0.004	0.991	0.005
MK0069	0.0043	0.9917	0.004
MK0070	0.003	0.994	0.003
MK0071	0.004	0.993	0.003
MK0072	0.004	0.992	0.004
MK0073	0.008	0.988	0.004
MK0074	0.0043	0.992	0.0037
MK0075	0.008	0.9343	0.0577
MK0076	0.006	0.989	0.005
MK0077	0.007	0.9887	0.0043
MK0078	0.003	0.9937	0.0033
MK0079	0.1107	0.843	0.0463
MK0080	0.004	0.992	0.004
MK0081	0.005	0.991	0.004
MK0082	0.005	0.991	0.004
MK0083	0.0057	0.9903	0.004
MK0084	0.004	0.993	0.003
MK0085	0.004	0.992	0.004
MK0086	0.003	0.994	0.003
MS0001	0.0253	0.0553	0.9194
MS0002	0.0093	0.009	0.9817
MS0003	0.009	0.017	0.974
MS0004	0.012	0.007	0.981
MS0005	0.005	0.017	0.978
MS0006	0.007	0.0083	0.9847
MS0007	0.008	0.006	0.986
MS0008	0.006	0.0043	0.9897
MS0009	0.0083	0.007	0.9847
MS0010	0.007	0.006	0.987
MS0011	0.005	0.0153	0.9797
MS0012	0.01	0.021	0.969
MS0013	0.012	0.005	0.983
MS0014	0.0293	0.009	0.9617
MS0015	0.013	0.004	0.983
MS0016	0.032	0.007	0.961
MS0017	0.5573	0.005	0.4377
MS0018	0.013	0.006	0.981
MS0019	0.0073	0.004	0.9887
MS0020	0.007	0.018	0.975
MS0021	0.004	0.005	0.991
MS0022	0.006	0.006	0.988
MS0023	0.01	0.1103	0.8797
MS0024	0.01	0.005	0.985
MS0025	0.008	0.005	0.987
MS0026	0.009	0.0133	0.9777
MS0027	0.005	0.05	0.945
MS0028	0.009	0.005	0.986
MS0029	0.012	0.006	0.982
MS0030	0.005	0.007	0.988
MS0031	0.006	0.0137	0.9803
MS0032	0.005	0.015	0.98
MS0033	0.008	0.004	0.988
MS0034	0.005	0.016	0.979
MS0035	0.006	0.005	0.989
MS0036	0.9857	0.0053	0.009
MS0037	0.0047	0.01	0.9853
MS0038	0.0133	0.04	0.9467
MS0039	0.007	0.011	0.982
MS0040	0.015	0.007	0.978
MS0041	0.022	0.0077	0.9704
MS0042	0.0047	0.003	0.9923
MS0043	0.0103	0.008	0.9817
MS0044	0.006	0.007	0.987
MS0045	0.0127	0.005	0.9823
MS0046	0.011	0.006	0.983
MS0047	0.005	0.013	0.982
MS0048	0.004	0.009	0.987
MS0049	0.009	0.01	0.981
MS0050	0.0467	0.012	0.9413
MS0051	0.0077	0.0043	0.988
MS0052	0.0113	0.006	0.9827
MS0053	0.0153	0.0123	0.9723
MS0054	0.008	0.02	0.972
MS0055	0.004	0.006	0.99
MS0056	0.006	0.011	0.983
MS0057	0.006	0.012	0.982
MS0058	0.006	0.005	0.989
MS0059	0.017	0.005	0.978
MS0060	0.01	0.008	0.982
MS0061	0.006	0.0053	0.9887
MS0062	0.007	0.01	0.983
MS0063	0.006	0.018	0.976
MS0064	0.006	0.006	0.988
MS0065	0.006	0.004	0.99
MS0066	0.0067	0.005	0.9883
MS0067	0.005	0.004	0.991
MS0068	0.015	0.0303	0.9547
MS0069	0.006	0.0063	0.9877
MS0070	0.008	0.011	0.981
MS0071	0.006	0.004	0.99
MS0072	0.007	0.006	0.987
MS0073	0.008	0.006	0.986
MS0074	0.0033	0.012	0.9847
MS0075	0.006	0.005	0.989
MS0076	0.016	0.008	0.976
MS0077	0.009	0.005	0.986
MS0078	0.008	0.019	0.973
MS0079	0.007	0.007	0.986
MS0080	0.005	0.005	0.99
MS0081	0.005	0.006	0.989
MS0082	0.0083	0.01	0.9817
MS0083	0.006	0.01	0.984
MS0084	0.018	0.008	0.974
MS0085	0.012	0.009	0.979
MS0086	0.008	0.004	0.988
MS0087	0.004	0.005	0.991
NAM11156	0.9117	0.004	0.0843
NAM11157	0.9066	0.0594	0.034
NAM11158	0.861	0.0584	0.0807
NAM11159	0.004	0.004	0.992
NAM11160	0.9857	0.0053	0.009
NAM11161	0.822	0.005	0.173
NAM11162	0.988	0.004	0.008
NAM11163	0.8413	0.008	0.1507
NAM11164	0.987	0.006	0.007
NAM11165	0.988	0.004	0.008
NAM11166	0.983	0.004	0.013
NAM11167	0.9266	0.0033	0.07
NAM11168	0.8762	0.005	0.1188
NAM11169	0.973	0.015	0.012
NAM11170	0.9777	0.007	0.0153
NAM11171	0.989	0.005	0.006
NB110004	0.8836	0.013	0.1034
NB110015	0.6785	0.3125	0.009
NB110016	0.9867	0.004	0.0093
NB110017	0.968	0.004	0.028
NB110018	0.99	0.003	0.007
NB110019	0.99	0.003	0.007
NB110029	0.6932	0.0203	0.2864
NB110030	0.9747	0.005	0.0203
NB110046	0.98	0.013	0.007
NB110047	0.992	0.004	0.004
NB110048	0.976	0.006	0.018
NB110052	0.987	0.005	0.008
NB110053	0.9257	0.006	0.0683
NB110054	0.9767	0.004	0.0193
NB110055	0.981	0.006	0.013
NB110059	0.989	0.003	0.008
NB110060	0.9817	0.005	0.0133
OC12e001	0.005	0.9897	0.0053
OC12e002	0.0053	0.9877	0.007
OC12e003	0.006	0.985	0.009
OC12e004	0.0107	0.9557	0.0337
OC12e005	0.009	0.6387	0.3523
OC12e006	0.013	0.8446	0.1424
OC12e007	0.005	0.99	0.005
OC12e008	0.011	0.9444	0.0447
OC12e009	0.028	0.965	0.007
OC12e010	0.004	0.991	0.005
OC12e011	0.006	0.989	0.005
OC12e012	0.005	0.9887	0.0063
OC12e013	0.005	0.975	0.02
OC12e014	0.0083	0.8323	0.1593
OC12e015	0.005	0.987	0.008
OC12e016	0.02	0.8227	0.1573
OC12e017	0.006	0.982	0.012
OC12e018	0.005	0.991	0.004
OC12e019	0.005	0.9737	0.0213
OC12e020	0.013	0.977	0.01
OK00001	0.968	0.014	0.018
OK00002	0.9353	0.005	0.0597
OK00003	0.882	0.0614	0.0567
OK00004	0.9763	0.0127	0.011
OK00005	0.981	0.007	0.012
OK00006	0.985	0.007	0.008
OK00007	0.9763	0.004	0.0197
OK00008	0.9847	0.004	0.0113
OK00009	0.979	0.006	0.015
OK00010	0.987	0.005	0.008
OK00011	0.986	0.006	0.008
OK00012	0.9726	0.004	0.0233
OK00013	0.9713	0.0183	0.0103
OK00014	0.986	0.006	0.008
OK00015	0.9797	0.004	0.0163
OK00016	0.9137	0.0197	0.0667
OK00017	0.989	0.003	0.008
OK00018	0.983	0.006	0.011
OK00019	0.99	0.004	0.006
OK00020	0.9823	0.005	0.0127
OK00021	0.989	0.004	0.007
OK00022	0.992	0.003	0.005
OK00023	0.987	0.007	0.006
OK00024	0.989	0.004	0.007
OK00025	0.985	0.006	0.009
OK00026	0.981	0.005	0.014
OK00027	0.988	0.005	0.007
OK00028	0.9877	0.006	0.0063
OK00029	0.9533	0.005	0.0417
OK00030	0.9797	0.009	0.0113
OK00031	0.958	0.0083	0.0337
OK00032	0.98	0.004	0.016
OK00033	0.9827	0.0103	0.007
OK00034	0.9847	0.0073	0.008
OK00035	0.982	0.004	0.014
OK00036	0.9733	0.006	0.0207
OK00037	0.974	0.0167	0.0093
OK00038	0.989	0.005	0.006
OK00039	0.984	0.005	0.011
OK00040	0.983	0.005	0.012
OK00041	0.9647	0.0183	0.017
OK00042	0.9273	0.0233	0.0493
OK00043	0.976	0.008	0.016
OK00044	0.985	0.0043	0.0107
OK00045	0.99	0.004	0.006
OK00046	0.983	0.0093	0.0077
OK00047	0.98	0.011	0.009
OK00048	0.986	0.007	0.007
OK00049	0.986	0.007	0.007
OK00050	0.9853	0.004	0.0107
OK00051	0.9913	0.004	0.0047
OK00052	0.989	0.004	0.007
OK00053	0.977	0.005	0.018
OK00054	0.987	0.004	0.009
OK00055	0.9857	0.003	0.0113
OK00056	0.977	0.006	0.017
OK00057	0.9417	0.006	0.0523
OK00058	0.973	0.006	0.021
OK00059	0.978	0.008	0.014
OK00060	0.967	0.012	0.021
OK00061	0.948	0.012	0.04
OK00062	0.9627	0.006	0.0313
OK00063	0.9927	0.0033	0.004
OK00064	0.9743	0.004	0.0217
OK00065	0.991	0.003	0.006
OK00066	0.9767	0.003	0.0203
OK00067	0.983	0.006	0.011
OK00068	0.989	0.005	0.006
OK00069	0.988	0.006	0.006
OK00070	0.989	0.005	0.006
OK00071	0.987	0.006	0.007
OK00072	0.9287	0.0643	0.007
OK00073	0.989	0.006	0.005
OK00074	0.984	0.005	0.011
OK00075	0.9803	0.008	0.0117
OK00076	0.951	0.004	0.045
OK00077	0.987	0.006	0.007
OK00078	0.983	0.006	0.011
OK00079	0.987	0.005	0.008
OK00080	0.9813	0.004	0.0147
OK00081	0.9743	0.011	0.0147
OK00082	0.982	0.0063	0.0117
OK00083	0.9887	0.004	0.0073
OK00084	0.9447	0.008	0.0473
OK00085	0.988	0.005	0.007
OK00086	0.993	0.003	0.004
OK00087	0.9907	0.004	0.0053
OK00088	0.9537	0.0123	0.034
OK00089	0.986	0.005	0.009
OK00090	0.9823	0.005	0.0127
OK00091	0.9683	0.007	0.0247
OK00092	0.988	0.005	0.007
OK00093	0.984	0.007	0.009
OK00094	0.9727	0.004	0.0233
OK00095	0.987	0.004	0.009
OK00096	0.9897	0.005	0.0053
OK00097	0.9903	0.004	0.0057
OK00098	0.984	0.005	0.011
OK00099	0.983	0.005	0.012
OK00100	0.987	0.005	0.008
OK00101	0.9863	0.004	0.0097
OK00102	0.9763	0.005	0.0187
OK00103	0.9857	0.005	0.0093
OK00104	0.9693	0.014	0.0167
OK00105	0.974	0.011	0.015
OK00106	0.9833	0.009	0.0077
OK00107	0.9477	0.01	0.0423
OK00108	0.9693	0.01	0.0207
OK00109	0.9887	0.005	0.0063
OK00110	0.987	0.004	0.009
OK00111	0.9863	0.005	0.0087
OK00112	0.991	0.003	0.006
OK00113	0.9887	0.0043	0.007
OK00114	0.984	0.004	0.012
OK00115	0.978	0.006	0.016
OK00116	0.982	0.006	0.012
OK00117	0.989	0.004	0.007
OK00118	0.99	0.004	0.006
OK00119	0.9696	0.003	0.0274
OT0001	0.0073	0.9827	0.01
OT0002	0.011	0.9013	0.0877
OT0003	0.005	0.983	0.012
OT0004	0.007	0.986	0.007
OT0005	0.0407	0.9403	0.019
OT0006	0.022	0.968	0.01
OT0007	0.005	0.988	0.007
OT0008	0.0133	0.9367	0.05
OT0009	0.007	0.953	0.04
OT0010	0.007	0.98	0.013
OT0011	0.0733	0.8963	0.0303
OT0012	0.0133	0.7105	0.2762
OT0013	0.005	0.989	0.006
OT0014	0.009	0.982	0.009
OT0015	0.005	0.988	0.007
OT0016	0.0247	0.9683	0.007
OT0017	0.004	0.991	0.005
OT0018	0.006	0.988	0.006
OT0019	0.004	0.99	0.006
OT0020	0.009	0.9733	0.0177
OT0021	0.012	0.973	0.015
OT0022	0.0043	0.9917	0.004
OT0023	0.005	0.8728	0.1223
OT0024	0.005	0.9833	0.0117
OT0025	0.008	0.975	0.017
OT0026	0.018	0.9597	0.0223
OT0027	0.0213	0.9677	0.011
OT0028	0.004	0.9663	0.0297
OT0029	0.005	0.9843	0.0107
OT0030	0.0877	0.8983	0.014
OT0031	0.025	0.9494	0.0257
OT0032	0.009	0.9793	0.0117
OT0033	0.006	0.987	0.007
OT0034	0.013	0.973	0.014
OT0035	0.007	0.9717	0.0213
OT0036	0.0117	0.9713	0.017
OT0037	0.0317	0.9613	0.007
OT0038	0.005	0.989	0.006
OT0039	0.0323	0.915	0.0527
OT0040	0.0323	0.7449	0.2227
OT0041	0.007	0.9867	0.0063
OT0042	0.005	0.987	0.008
OT0043	0.0043	0.9753	0.0203
OT0044	0.029	0.859	0.112
OT0045	0.004	0.993	0.003
OT0046	0.003	0.989	0.008
OT0047	0.006	0.965	0.029
OT0048	0.008	0.986	0.006
OT0049	0.0117	0.9387	0.0497
OT0050	0.026	0.9503	0.0237
OT0051	0.022	0.9657	0.0123
OT0052	0.021	0.929	0.05
OT0053	0.005	0.989	0.006
OT0054	0.016	0.979	0.005
OT0055	0.004	0.992	0.004
OT0056	0.01	0.981	0.009
OT0057	0.0093	0.9757	0.015
OT0058	0.0157	0.9517	0.0327
OT0059	0.012	0.968	0.02
OT0060	0.0033	0.9927	0.004
OT0061	0.004	0.991	0.005
OT0062	0.008	0.9847	0.0073
OT0063	0.007	0.9647	0.0283
OT0064	0.0087	0.9614	0.03
OT0065	0.006	0.9357	0.0583
OT0066	0.0553	0.851	0.0937
OT0067	0.1266	0.8594	0.014
OT0068	0.01	0.979	0.011
OT0069	0.1651	0.7052	0.1297
OT0070	0.004	0.991	0.005
OT0071	0.003	0.993	0.004
OT0072	0.005	0.986	0.009
OT0073	0.021	0.9503	0.0287
OT0074	0.0127	0.9767	0.0107
OT0075	0.003	0.993	0.004
OT0076	0.007	0.988	0.005
OT0077	0.005	0.9817	0.0133
OT0078	0.012	0.9567	0.0313
OT0079	0.007	0.982	0.011
OT0080	0.008	0.984	0.008
OT0081	0.005	0.9763	0.0187
OT0082	0.006	0.9847	0.0093
OT0083	0.008	0.9857	0.0063
OT0084	0.005	0.9857	0.0093
OT0085	0.003	0.992	0.005
OT0086	0.026	0.9434	0.0307
OT0087	0.005	0.984	0.011
OT0088	0.004	0.989	0.007
OT0089	0.056	0.925	0.019
OT0090	0.008	0.985	0.007
OT0091	0.007	0.988	0.005
OT0092	0.1127	0.8736	0.0137
OT0093	0.0113	0.9537	0.035
OT0094	0.0337	0.9054	0.061
OT0095	0.005	0.989	0.006
OT0096	0.009	0.985	0.006
OT0097	0.005	0.9747	0.0203
OT0098	0.006	0.987	0.007
OT0099	0.004	0.978	0.018
OT0100	0.007	0.9863	0.0067
OT0101	0.006	0.9713	0.0227
OT0102	0.004	0.99	0.006
OT0103	0.005	0.99	0.005
OT0104	0.005	0.99	0.005
PT09e0142	0.032	0.9557	0.0123
PT09e0143	0.0073	0.9767	0.016
PT09e0144	0.0083	0.9867	0.005
PT09e0145	0.003	0.9923	0.0047
PT09e0146	0.004	0.992	0.004
PT09e0147	0.009	0.981	0.01
PT09e0148	0.005	0.991	0.004
PT09e0149	0.004	0.991	0.005
PT09e0150	0.006	0.99	0.004
PT09e0235	0.015	0.9757	0.0093
PT09e0236	0.0347	0.9453	0.02
PT09e0237	0.016	0.9673	0.0167
PT09e0238	0.046	0.927	0.027
PT09e0239	0.004	0.9917	0.0043
PT09e0240	0.004	0.992	0.004
PT09e0241	0.006	0.99	0.004
PT09e0242	0.018	0.977	0.005
PT09e0243	0.2415	0.7482	0.0103
PT09e0244	0.015	0.9727	0.0123
PT09e0474	0.01	0.977	0.013
PT09e0475	0.009	0.986	0.005
PT09e0476	0.005	0.9853	0.0097
PT09e0477	0.012	0.9747	0.0133
PT09e0478	0.0223	0.9443	0.0333
PT09e0479	0.0113	0.9807	0.008
PT09e0480	0.0263	0.9477	0.026
SA11e001	0.989	0.005	0.006
SA11e002	0.9567	0.004	0.0393
SA11e003	0.976	0.016	0.008
SA11e004	0.986	0.008	0.006
SA11e005	0.944	0.039	0.017
SA11e006	0.984	0.006	0.01
SA11e007	0.9863	0.006	0.0077
SA11e008	0.9907	0.004	0.0053
SA11e009	0.992	0.004	0.004
SA11e010	0.8307	0.0603	0.109
SA11e011	0.979	0.016	0.005
SA11e012	0.987	0.005	0.008
SA11e013	0.974	0.008	0.018
SA11e014	0.9853	0.005	0.0097
SA11e015	0.991	0.004	0.005
TB110005	0.6883	0.2793	0.0323
TB110006	0.8163	0.1453	0.0383
TB110007	0.7303	0.2483	0.0213
TB110008	0.7166	0.2691	0.0143
TB110009	0.9393	0.0527	0.008
TB110010	0.989	0.0043	0.0067
TB110011	0.977	0.014	0.009
TB110012	0.7677	0.2223	0.01
TB110013	0.0343	0.1809	0.7847
TB110014	0.745	0.2393	0.0157
TB110020	0.987	0.008	0.005
TB110021	0.9717	0.005	0.0233
TB110022	0.9753	0.0073	0.0173
TB110023	0.671	0.3083	0.0207
TB110024	0.845	0.137	0.018
TB110025	0.812	0.0583	0.1297
TB110026	0.7973	0.1427	0.06
TB110027	0.7547	0.2323	0.013
TB110028	0.9427	0.0453	0.012
TB110031	0.9843	0.006	0.0097
TB110032	0.8164	0.1776	0.006
TB110042	0.965	0.025	0.01
TB110043	0.8603	0.0333	0.1063
TB110044	0.737	0.187	0.076
TB110045	0.8364	0.1253	0.0383
TB110049	0.9343	0.0567	0.009
TB110050	0.7454	0.1303	0.1243
TB110051	0.7826	0.1961	0.0213

## Sheet: Updated IDs mtDNA data
mtDNA ID	Updated ID
AM11e0031	AM11e0031
AM11e004m	AM11e004m
AM11e0053	AM11e0053
AM11e006m	AM11e006m
AM11e009m	AM11e009m
AM11e010m	AM11e010m
AM11e013m	AM11e013m
AM11e014m	AM11e014m
AM11e0155	AM11e0155
AM11e022m	AM11e022m
AM11e024m	AM11e024m
AM11e025m	AM11e025m
AM11e026m	AM11e026m
AM11e038m	AM11e038m
AM11e039m	AM11e039m
AM11e0409	AM11e0409
BN09e0245	BN09e0245
BN09e0247	BN09e0247
BN09e0248	BN09e0248
BN09e0257	BN09e0257
BN09e0265	BN09e0265
BN09e0270	BN09e0270
BN09e0381	BN09e0381
BN09e0410	BN09e0410
BN09e0421	BN09e0421
BN09e0452	BN09e0452
BN09e0485	BN09e0485
BN09e0502	BN09e0502
BN09e0504	BN09e0504
BN09e0511	BN09e0511
BN11_0001	BN11_0001
BN11_0002	BN11_0002
BN11_0033	BN11_0033
BN11_0034	BN11_0034
BN11_0036	BN11_0036
BN11_0037	BN11_0037
BN11_0038	BN11_0038
BN11_0056	BN11_0056
BN11_0057	BN11_0057
BN11_0061	BN11_0061
BN11_0062	BN11_0062
BN11_0063	BN11_0063
Bu09e0352	Bu09e0352
Bu09e0353	Bu09e0353
Bu09e0354	Bu09e0354
Bu09e0355	Bu09e0355
Bu09e0360	Bu09e0360
Bu09e0370	Bu09e0370
Bu09e0518	Bu09e0518
Bu09e0548	Bu09e0548
Bu09e0550	Bu09e0550
Bu09e0553	Bu09e0553
Bu09e0554	Bu09e0554
Bu09e0673	Bu09e0673
Bu09e0678	Bu09e0678
Bu09e0685	Bu09e0685
Bu09e0692	Bu09e0692
Bu09e0697	Bu09e0697
Bu09e0699	Bu09e0699
Bu09e0715	Bu09e0715
Bu09e0734	Bu09e0734
BUK11e001	BUK11e001
BUK11e002	BUK11e002
BUK11e004	BUK11e004
BUK11e005	BUK11e005
BUK11e006	BUK11e006
BUK11e008	BUK11e008
BUK11e017	BUK11e017
BUK11e018	BUK11e018
BUK11e019	BUK11e019
BUK11e020	BUK11e020
BUK11e021	BUK11e021
BUK11e022	BUK11e022
BUK11e023	BUK11e023
BUK11e024	BUK11e024
GU296746	GU296746
GU296747	GU296747
GU296748	GU296748
GU2967482	GU2967482
GU2967483	GU2967483
GU296749	GU296749
GU2967492	GU2967492
GU2967493	GU2967493
GU2967494	GU2967494
GU2967495	GU2967495
GU2967496	GU2967496
GU296750	GU296750
GU2967502	GU2967502
GU2967503	GU2967503
GU2967504	GU2967504
GU296751	GU296751
GU296752	GU296752
GU2967522	GU2967522
GU2967523	GU2967523
GU2967524	GU2967524
GU2967525	GU2967525
GU2967526	GU2967526
GU2967527	GU2967527
GU2967528	GU2967528
GU2967529	GU2967529
GU296752a	GU296752a
GU296752b	GU296752b
GU296753	GU296753
GU2967532	GU2967532
GU296754	GU296754
GU2967542	GU2967542
GU2967543	GU2967543
GU2967544	GU2967544
GU296755	GU296755
GU2967552	GU2967552
GU2967553	GU2967553
GU2967554	GU2967554
GU296756	GU296756
GU2967562	GU2967562
GU296757	GU296757
GU2967572	GU2967572
GU296758	GU296758
GU296759	GU296759
GU296760	GU296760
GU2967602	GU2967602
GU2967603	GU2967603
GU2967604	GU2967604
GU2967605	GU2967605
GU2967606	GU2967606
GU2967607	GU2967607
GU2967608	GU2967608
GU296761	GU296761
GU296762	GU296762
GU2967622	GU2967622
GU2967623	GU2967623
GU2967624	GU2967624
GU2967625	GU2967625
GU2967626	GU2967626
GU2967627	GU2967627
GU2967628	GU2967628
GU2967629	GU2967629
GU296762a	GU296762a
GU296762b	GU296762b
GU296762c	GU296762c
GU296762d	GU296762d
GU296762e	GU296762e
GU296762f	GU296762f
GU296763	GU296763
GU2967632	GU2967632
GU296764	GU296764
GU2967642	GU2967642
GU2967643	GU2967643
GU2967644	GU2967644
GU2967645	GU2967645
GU2967646	GU2967646
GU2967647	GU2967647
GU2967648	GU2967648
GU2967649	GU2967649
GU296764a	GU296764a
GU296764b	GU296764b
GU296764c	GU296764c
GU296764d	GU296764d
GU296764e	GU296764e
GU296764f	GU296764f
GU296764g	GU296764g
GU296764h	GU296764h
GU296764i	GU296764i
GU296764j	GU296764j
GU296764k	GU296764k
GU296764l	GU296764l
GU296764m	GU296764m
GU296764n	GU296764n
GU296764o	GU296764o
GU296764p	GU296764p
GU296764q	GU296764q
GU296764r	GU296764r
GU296764s	GU296764s
GU296764t	GU296764t
GU296764u	GU296764u
GU296764v	GU296764v
GU296764w	GU296764w
GU296764x	GU296764x
GU296764y	GU296764y
GU296764z	GU296764z
GU296765	GU296765
GU296766	GU296766
GU2967662	GU2967662
GU2967663	GU2967663
GU2967664	GU2967664
GU2967665	GU2967665
GU2967666	GU2967666
GU2967667	GU2967667
GU2967668	GU2967668
GU2967669	GU2967669
GU296766a	GU296766a
GU296766b	GU296766b
GU296766c	GU296766c
GU296766d	GU296766d
GU296766e	GU296766e
GU296766f	GU296766f
GU296766g	GU296766g
GU296766h	GU296766h
GU296766i	GU296766i
GU296767	GU296767
GU296768	GU296768
GU2967682	GU2967682
GU2967683	GU2967683
GU296769	GU296769
GU29676a1	GU29676a1
GU29676a2	GU29676a2
GU29676a3	GU29676a3
GU29676a4	GU29676a4
GU29676a5	GU29676a5
GU29676a6	GU29676a6
GU29676a7	GU29676a7
GU29676a8	GU29676a8
GU29676a9	GU29676a9
GU29676aa	GU29676aa
GU29676ab	GU29676ab
GU29676ac	GU29676ac
GU29676ad	GU29676ad
GU29676ae	GU29676ae
GU29676af	GU29676af
GU29676ag	GU29676ag
GU29676ah	GU29676ah
GU296770	GU296770
GU296771	GU296771
GU2967712	GU2967712
GU296772	GU296772
GU2967722	GU2967722
GU2967723	GU2967723
GU2967724	GU2967724
GU2967725	GU2967725
GU2967726	GU2967726
GU2967727	GU2967727
GU2967728	GU2967728
GU2967729	GU2967729
GU296772a	GU296772a
GU296772b	GU296772b
GU296772c	GU296772c
GU296772d	GU296772d
GU296772e	GU296772e
GU296772f	GU296772f
GU296772g	GU296772g
GU296772h	GU296772h
GU296772i	GU296772i
GU296772j	GU296772j
GU296772k	GU296772k
GU296772l	GU296772l
GU296772m	GU296772m
GU296772n	GU296772n
GU296772o	GU296772o
GU296772p	GU296772p
GU296772q	GU296772q
GU296772r	GU296772r
GU296772s	GU296772s
GU296772t	GU296772t
GU296772u	GU296772u
GU296772v	GU296772v
GU296772w	GU296772w
GU296772x	GU296772x
GU296772y	GU296772y
GU296772z	GU296772z
GU296773	GU296773
GU296774	GU296774
GU2967742	GU2967742
GU296775	GU296775
GU2967752	GU2967752
GU2967753	GU2967753
GU2967754	GU2967754
GU2967755	GU2967755
GU2967756	GU2967756
GU2967757	GU2967757
GU2967758	GU2967758
GU2967759	GU2967759
GU296775a	GU296775a
GU296775b	GU296775b
GU296775c	GU296775c
GU296775d	GU296775d
GU296775e	GU296775e
GU296775f	GU296775f
GU296775g	GU296775g
GU296775h	GU296775h
GU296775i	GU296775i
GU296776	GU296776
GU296777	GU296777
GU2967772	GU2967772
GU2967773	GU2967773
GU2967774	GU2967774
GU2967775	GU2967775
GU2967776	GU2967776
GU2967777	GU2967777
GU2967778	GU2967778
GU2967779	GU2967779
GU296777a	GU296777a
GU296777b	GU296777b
GU296778	GU296778
GU2967782	GU2967782
GU2967783	GU2967783
GU2967784	GU2967784
GU2967785	GU2967785
GU2967786	GU2967786
GU296779	GU296779
GU2967792	GU2967792
GU2967793	GU2967793
GU29677a1	GU29677a1
GU29677a2	GU29677a2
GU29677a3	GU29677a3
GU29677a4	GU29677a4
GU29677a5	GU29677a5
GU29677a6	GU29677a6
GU29677a7	GU29677a7
GU29677a8	GU29677a8
GU29677a9	GU29677a9
GU29677aa	GU29677aa
GU29677ab	GU29677ab
GU29677ac	GU29677ac
GU29677ad	GU29677ad
GU29677ae	GU29677ae
GU296780	GU296780
GU296781	GU296781
GU2967812	GU2967812
GU2967813	GU2967813
GU2967814	GU2967814
GU2967815	GU2967815
GU2967816	GU2967816
GU2967817	GU2967817
GU2967818	GU2967818
GU2967819	GU2967819
GU296781a	GU296781a
GU296781b	GU296781b
GU296781c	GU296781c
GU296781d	GU296781d
GU296781e	GU296781e
GU296781f	GU296781f
GU296781g	GU296781g
GU296781h	GU296781h
GU296781i	GU296781i
GU296781j	GU296781j
GU296781k	GU296781k
GU296781l	GU296781l
GU296781m	GU296781m
GU296781n	GU296781n
GU296781o	GU296781o
GU296781p	GU296781p
GU296781q	GU296781q
GU296782	GU296782
GU2967822	GU2967822
GU2967823	GU2967823
GU2967824	GU2967824
GU2967825	GU2967825
GU2967826	GU2967826
GU2967827	GU2967827
GU2967828	GU2967828
GU2967829	GU2967829
GU296782a	GU296782a
GU296782b	GU296782b
GU296782c	GU296782c
GU296782d	GU296782d
GU296782e	GU296782e
GU296782f	GU296782f
GU296782g	GU296782g
GU296782h	GU296782h
GU296782i	GU296782i
GU296782j	GU296782j
GU296782k	GU296782k
GU296782l	GU296782l
GU296782m	GU296782m
GU296782n	GU296782n
GU296782o	GU296782o
GU296782p	GU296782p
GU296782q	GU296782q
GU296782r	GU296782r
GU296782s	GU296782s
GU296782t	GU296782t
GU296782u	GU296782u
GU296782v	GU296782v
GU296782w	GU296782w
GU296783	GU296783
GU296784	GU296784
GU2967842	GU2967842
GU296785	GU296785
GU2967852	GU2967852
GU2967853	GU2967853
GU2967854	GU2967854
GU2967855	GU2967855
GU2967856	GU2967856
GU2967857	GU2967857
GU296786	GU296786
JN10e1149	JN10e1149
JN11e0011	JN11e0011
KAY11e001	KAY11e001
KF10e1229	KF10e1229
KF10e1230	KF10e1230
KF10e1231	KF10e1231
KF10e1234	KF10e1234
KF10e1241	KF10e1241
KF10e1242	KF10e1242
KF10e1243	KF10e1243
KF10e1244	KF10e1244
KF10e1245	KF10e1245
KF10e1246	KF10e1246
KF10e1252	KF10e1252
KF10e1253	KF10e1253
KF10e1254	KF10e1254
KF10e1255	KF10e1255
KF10e1256	KF10e1256
KF11e0021	KF11e0021
KF11e0033	KF11e0033
KF11e0043	KF11e0043
KR11e001m	KR11e001m
KR11e0241	KR11e0241
KR11e036m	KR11e036m
KR11e038m	KR11e038m
KR11e048m	KR11e048m
KR11e060m	KR11e060m
KR11e062m	KR11e062m
KR11e0742	KR11e0742
KR11e086m	KR11e086m
KT11e001m	KT11e001m
KT11e006m	KT11e006m
KT11e011m	KT11e011m
KT11e011m	KT11e011m
KT11e013m	KT11e013m
KT11e014m	KT11e014m
KT11e0159	KT11e0159
KT11e0188	KT11e0188
MK09e0995	MK09e0995
MK09e0996	MK09e0996
MK09e0997	MK09e0997
MK09e0998	MK09e0998
MK09e0999	MK09e0999
MK09e1000	MK09e1000
MK09e1001	MK09e1001
MK09e1002	MK09e1002
MK09e1004	MK09e1004
MK09e1005	MK09e1005
MK09e1006	MK09e1006
MK09e1007	MK09e1007
MK09e1008	MK09e1008
MK09e1047	MK09e1047
MK09e1048	MK09e1048
MK09e1050	MK09e1050
MK09e1051	MK09e1051
MK09e1052	MK09e1052
MS10e1112	MS10e1112
MS11e020m	MS11e020m
MS11e022m	MS11e022m
MS11e023m	MS11e023m
MS11e029m	MS11e029m
MS11e031m	MS11e031m
MS11e036m	MS11e036m
MS11e037m	MS11e037m
MS11e040m	MS11e040m
MS11e048m	MS11e048m
MS11e0493	MS11e0493
MS11e051m	MS11e051m
MS11e053m	MS11e053m
MS11e057m	MS11e057m
MS11e0596	MS11e0596
NAM10001m	NAM10001m
NAM10004m	NAM10004m
NAM10005m	NAM10005m
NAM10006m	NAM10006m
NAM10009m	NAM10009m
NAM10010m	NAM10010m
NAM10011m	NAM10011m
NAM10012m	NAM10012m
NAM10017m	NAM10017m
NAM10019m	NAM10019m
NAM100201	NAM100201
NAM10022m	NAM10022m
NAM10024m	NAM10024m
NAM10025m	NAM10025m
NAM10026m	NAM10026m
NAM10028m	NAM10028m
NAM10030m	NAM10030m
NAM10032m	NAM10032m
NAM10033m	NAM10033m
NAM10034m	NAM10034m
NAM10041m	NAM10041m
NAM100421	NAM100421
NAM10044m	NAM10044m
NAM10047m	NAM10047m
NAM100482	NAM100482
NAM100492	NAM100492
NAM10052m	NAM10052m
NAM10054m	NAM10054m
NAM10055m	NAM10055m
NAM10056m	NAM10056m
NAM10057m	NAM10057m
NB11_0004	NB11_0004
NB11_0016	NB11_0016
NB11_0017	NB11_0017
NB11_0018	NB11_0018
NB11_0019	NB11_0019
NB11_0029	NB11_0029
NB11_0030	NB11_0030
NB11_0047	NB11_0047
NB11_0048	NB11_0048
NB11_0052	NB11_0052
NB11_0053	NB11_0053
NB11_0054	NB11_0054
NB11_0055	NB11_0055
NB11_0059	NB11_0059
OC12e0021	OC12e0021
OC12e003m	OC12e003m
OC12e004m	OC12e004m
OC12e005m	OC12e005m
OC12e006m	OC12e006m
OC12e007m	OC12e007m
OC12e008m	OC12e008m
OC12e009m	OC12e009m
OC12e010m	OC12e010m
OC12e011m	OC12e011m
OC12e012m	OC12e012m
OC12e013m	OC12e013m
OC12e014m	OC12e014m
OC12e015m	OC12e015m
OC12e0165	OC12e0165
OC12e0177	OC12e0177
OK09e0284	OK09e0284
OK09e0292	OK09e0292
OK09e0299	OK09e0299
OK09e0301	OK09e0301
OK09e0328	OK09e0328
OK09e0330	OK09e0330
OK09e0570	OK09e0570
OK09e0578	OK09e0578
OK09e0590	OK09e0590
OK09e0600	OK09e0600
OK09e0611	OK09e0611
OK09e0628	OK09e0628
OK09e0631	OK09e0631
OK09e0635	OK09e0635
OK09e0645	OK09e0645
OK09e0650	OK09e0650
OK09e0651	OK09e0651
OK09e0660	OK09e0660
OT09e0762	OT09e0762
OT09e0764	OT09e0764
OT09e0774	OT09e0774
OT09e0788	OT09e0788
OT09e0791	OT09e0791
OT09e0817	OT09e0817
OT09e0832	OT09e0832
OT09e0835	OT09e0835
OT09e0863	OT09e0863
OT09e0864	OT09e0864
OT09e0865	OT09e0865
OT09e0873	OT09e0873
OT09e0878	OT09e0878
OT09e0895	OT09e0895
OT09e0903	OT09e0903
OT09e0905	OT09e0905
OT09e0908	OT09e0908
OT09e0933	OT09e0933
OT09e0980	OT09e0980
OT09e0988	OT09e0988
S10_11d00	IGG_11d00
S10_11d00	IGG_11d00
S10_11d00	IGG_11d00
S10_11d00	IGG_11d00
S10_11d00	IGG_11d00
S10_11d01	IGG_11d01
S10_11d01	IGG_11d01
S10_11d01	IGG_11d01
S10_11d01	IGG_11d01
S10_11d01	IGG_11d01
S6_11d002	MGG_11d002
S6_11d003	MGG_11d003
S6_11d004	MGG_11d004
S6_11d005	MGG_11d005
S6_11d006	MGG_11d006
S6_11d007	MGG_11d007
S6_11d008	MGG_11d008
S6_11d009	MGG_11d009
S6_11d011	MGG_11d011
S6_11d012	MGG_11d012
S6_11d013	MGG_11d013
MGG11_236	MGG11_236
MGG11_237	MGG11_237
MGG11_238	MGG11_238
SA11e0015	SA11e0015
SA11e0017	SA11e0017
SA11e001m	SA11e001m
SA11e001m	SA11e001m
SA11e001m	SA11e001m
SA11e001m	SA11e001m
SA11e001m	SA11e001m
SA11e001m	SA11e001m
SA11e001m	SA11e001m
SA11e001m	SA11e001m
SA11e001m	SA11e001m
SA11e001m	SA11e001m
SA11e001m	SA11e001m
SA11e001m	SA11e001m
SA11e001m	SA11e001m
TB11_0010	TB11_0010
TB11_0011	TB11_0011
TB11_0012	TB11_0012
TB11_0014	TB11_0014
TB11_0020	TB11_0020
TB11_0021	TB11_0021
TB11_0022	TB11_0022
TB11_0023	TB11_0023
TB11_0024	TB11_0024
TB11_0025	TB11_0025
TB11_0026	TB11_0026
TB11_0027	TB11_0027
TB11_0028	TB11_0028
TB11_0031	TB11_0031
TB11_0032	TB11_0032

## Sheet: mtDNA & micros combined
Sample	microsatellite cluster	mtDNA cluster
AM11e009	N	I
BN00024	N	I
BN00025	N	I
BN00026	N	I
OC12e004	N	I
OC12e005	N	I
OC12e006	N	I
OC12e007	N	I
OC12e008	N	I
OC12e009	N	I
OC12e010	N	I
AM11e001	N	N
AM11e002	N	N
AM11e003	N	N
AM11e004	N	N
AM11e005	N	N
AM11e006	N	N
AM11e008	N	N
AM11e010	N	N
AM11e013	N	N
AM11e014	N	N
AM11e015	N	N
AM11e016	N	N
AM11e017	N	N
AM11e022	N	N
AM11e024	N	N
BN00003	N	N
BN00004	N	N
BN00005	N	N
BN00006	N	N
BN00008	N	N
BN00009	N	N
BN00010	N	N
BN00012	N	N
BN00013	N	N
BN00014	N	N
BN00015	N	N
BN00016	N	N
BN00017	N	N
BN00018	N	N
BN00019	N	N
BN00020	N	N
BN00021	N	N
BN00022	N	N
BN00023	N	N
MK0001	N	N
MK0002	N	N
MK0003	N	N
MK0004	N	N
MK0005	N	N
MK0006	N	N
MK0007	N	N
MK0008	N	N
MK0009	N	N
MK0010	N	N
MK0011	N	N
MK0012	N	N
MK0013	N	N
MK0014	N	N
MK0016	N	N
MK0017	N	N
MK0018	N	N
OC12e002	N	N
OC12e003	N	N
OC12e011	N	N
OC12e012	N	N
OC12e013	N	N
OC12e014	N	N
OC12e015	N	N
OC12e016	N	N
OT0002	N	N
OT0003	N	N
OT0004	N	N
OT0005	N	N
OT0006	N	N
OT0007	N	N
OT0008	N	N
OT0009	N	N
OT0010	N	N
OT0011	N	N
OT0012	N	N
OT0013	N	N
OT0014	N	N
OT0015	N	N
OT0016	N	N
OT0017	N	N
OT0018	N	N
OT0019	N	N
OT0020	N	N
BN00007	N	S
BN00001	N	W
NAM11156	S	I
NAM11165	S	I
NAM11163	S	N
BU00001	S	S
Bu00002	S	S
BU00003	S	S
BU00004	S	S
BU00005	S	S
BU00006	S	S
BU00007	S	S
BU00008	S	S
BU00009	S	S
BU00010	S	S
BU00011	S	S
BU00012	S	S
BU00013	S	S
BU00014	S	S
BU00015	S	S
BU00016	S	S
BU00017	S	S
BU00018	S	S
BU00019	S	S
MGG11013	S	S
MGG11014	S	S
NAM11157	S	S
NAM11158	S	S
NAM11160	S	S
NAM11161	S	S
NAM11162	S	S
NAM11164	S	S
NAM11166	S	S
NAM11168	S	S
NAM11169	S	S
NAM11170	S	S
NAM11171	S	S
NB110004	S	S
NB110015	S	S
NB110016	S	S
NB110017	S	S
NB110018	S	S
NB110019	S	S
NB110029	S	S
NB110030	S	S
NB110046	S	S
NB110047	S	S
NB110048	S	S
NB110052	S	S
NB110054	S	S
OK00001	S	S
OK00002	S	S
OK00003	S	S
OK00004	S	S
OK00005	S	S
OK00006	S	S
OK00007	S	S
OK00008	S	S
OK00009	S	S
OK00010	S	S
OK00011	S	S
OK00012	S	S
OK00013	S	S
OK00014	S	S
OK00015	S	S
OK00016	S	S
OK00017	S	S
OK00018	S	S
SA11e001	S	S
SA11e002	S	S
SA11e003	S	S
SA11e004	S	S
SA11e005	S	S
SA11e006	S	S
SA11e007	S	S
SA11e008	S	S
SA11e009	S	S
SA11e010	S	S
SA11e011	S	S
SA11e012	S	S
SA11e013	S	S
SA11e014	S	S
SA11e015	S	S
JN0001	S	W
JN0002	S	W
KF0009	W	S
KF0010	W	S
KR0001	W	S
KR0004	W	S
MGG11072	W	S
MS0003	W	S
MS0013	W	S
MS0015	W	S
NAM11159	W	S
BN00011	W	W
KF0001	W	W
KF0002	W	W
KF0003	W	W
KF0004	W	W
KF0005	W	W
KF0006	W	W
KF0007	W	W
KF0008	W	W
KF0011	W	W
KF0012	W	W
KF0013	W	W
KF0014	W	W
KF0015	W	W
KF0016	W	W
KF0017	W	W
KF0018	W	W
KR0002	W	W
KR0003	W	W
KR0005	W	W
KR0006	W	W
KR0008	W	W
KR0009	W	W
MS0001	W	W
MS0002	W	W
MS0005	W	W
MS0006	W	W
MS0007	W	W
MS0008	W	W
MS0009	W	W
MS0010	W	W
MS0011	W	W
MS0012	W	W
MS0014	W	W
