# Supplementary figures and images for: Genetically DistinctGlossina fuscipes fuscipesPopulations in the Lake Kyoga Region of Uganda and Its Relevance for Human African Trypanosomiasis
Source: Hindawi journal article supplement (doi:10.1155/2013/614721), 2013-01-01

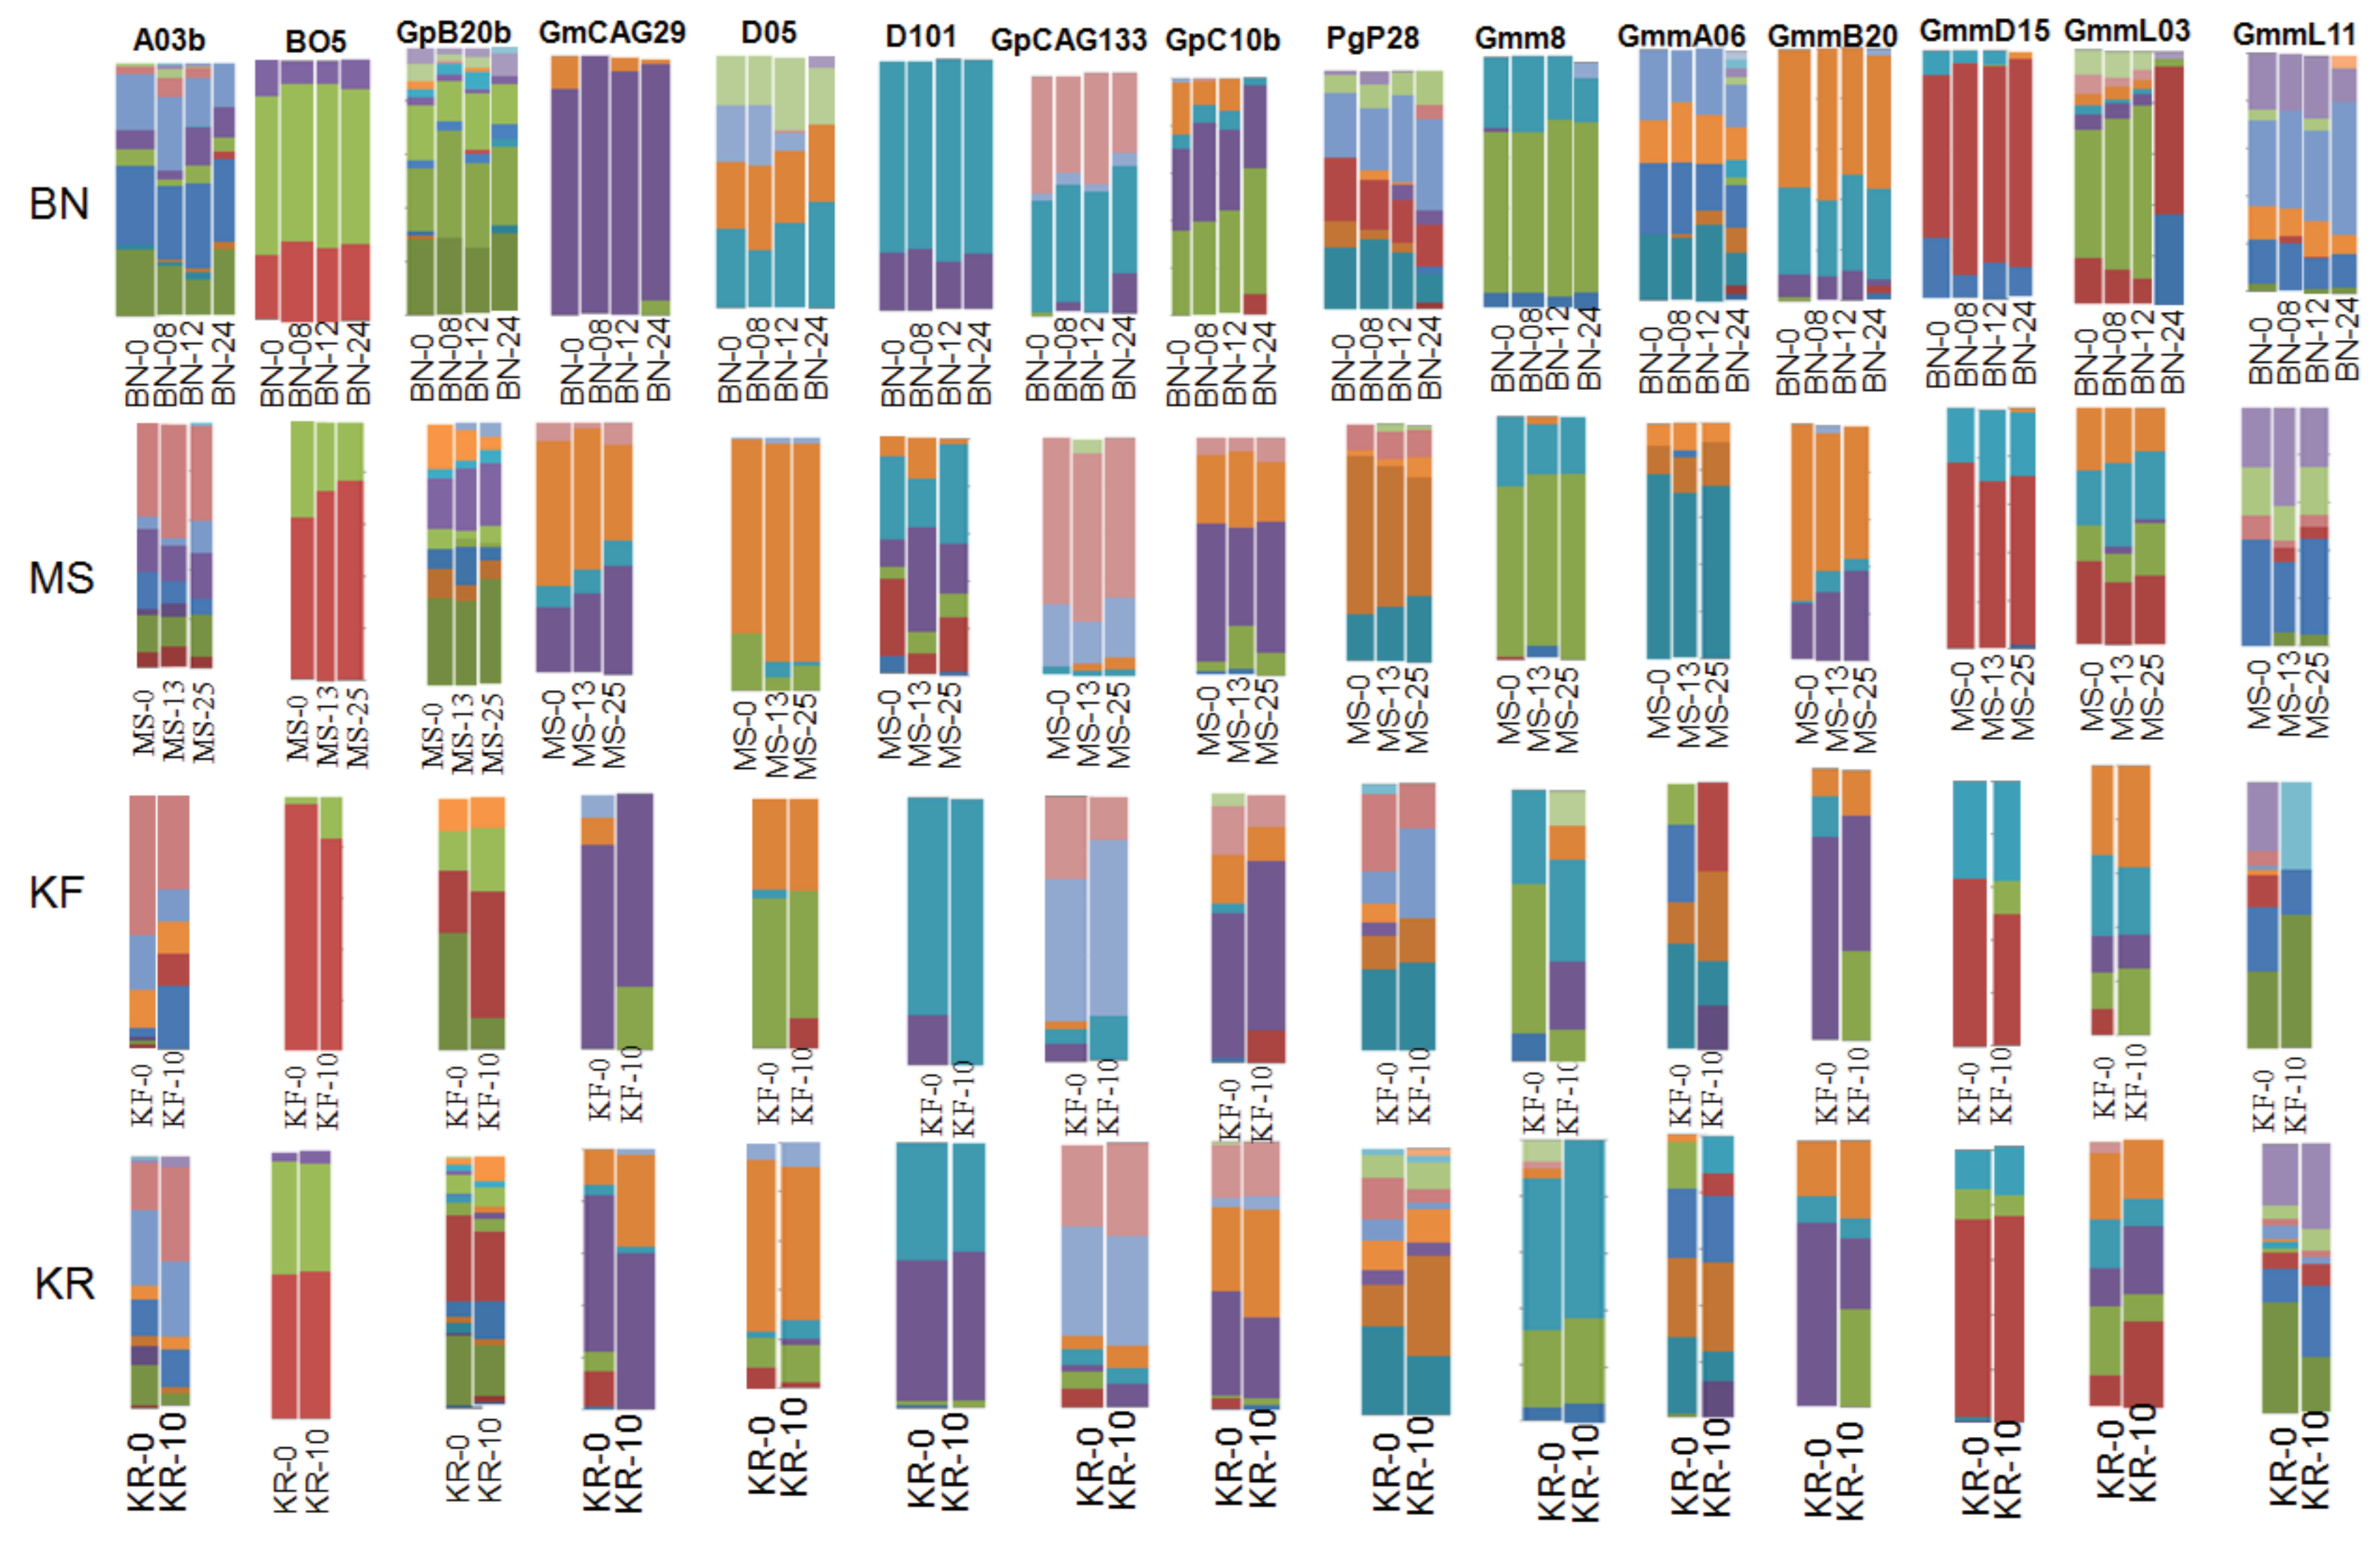

Supplement: f1 [file 614721.f1.zip]
